# Supplementary material for: A Role for Chromatin Remodeling in Cohesin Loading onto Chromosomes
Source: PubMed Central journal article supplement (PMC6527865; doi:10.1016/j.molcel.2019.02.027), 2019-05-16
Supplement: mmc1.pdf [file mmc1.pdf]

**Molecular Cell, Volume 74**

**Supplemental Information**

**A Role for Chromatin Remodeling  
in Cohesin Loading onto Chromosomes**

**Sofía Muñoz, Masashi Minamino, Corella S. Casas-Delucchi, Harshil Patel, and Frank Uhlmann**

Figure S1

**A**

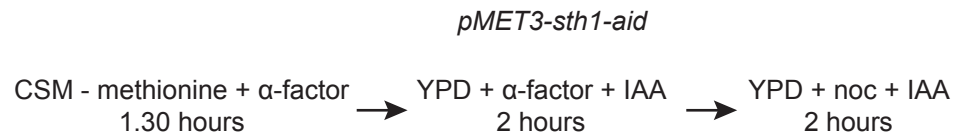

**B**

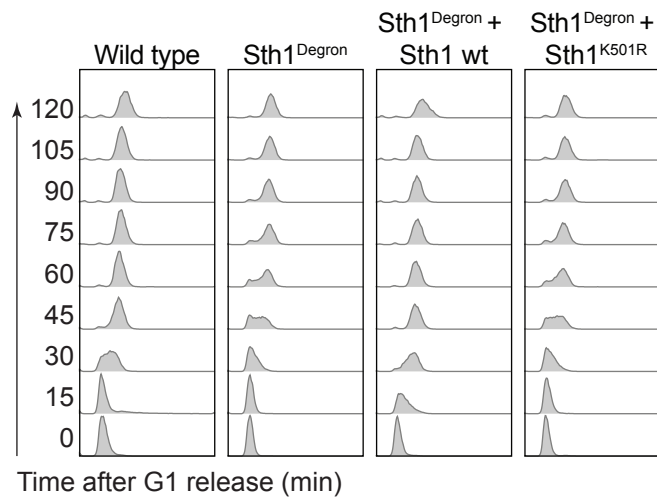

**C**

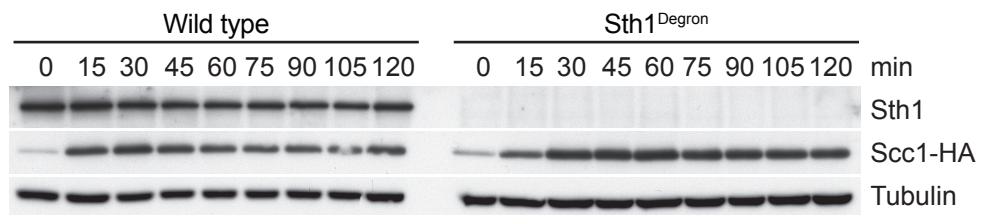

**Figure S1. Cell Synchronization Protocol Used in This Study, Related to Figure 1**

(A) Schematic of the experimental procedure followed in the *in vivo* experiments contained in this study to deplete either endogenous Sth1 or Scc2.

(B) FACS analysis of DNA content during the experiment shown in Figure 1B. A wild type control is included as well as the Sth1<sup>Degron</sup> strain in which Sth1 was depleted, next to Sth1<sup>Degron</sup> strains expressing either wild type Sth1 or Sth1<sup>K501R</sup> from an ectopic locus.

(C) Time course analysis Scc1 levels in strains expressing or depleted of Sth1. Samples for immunoblotting were taken at 15 minute intervals following release from G1 arrest into nocodazole-containing medium.

Figure S2

**A**

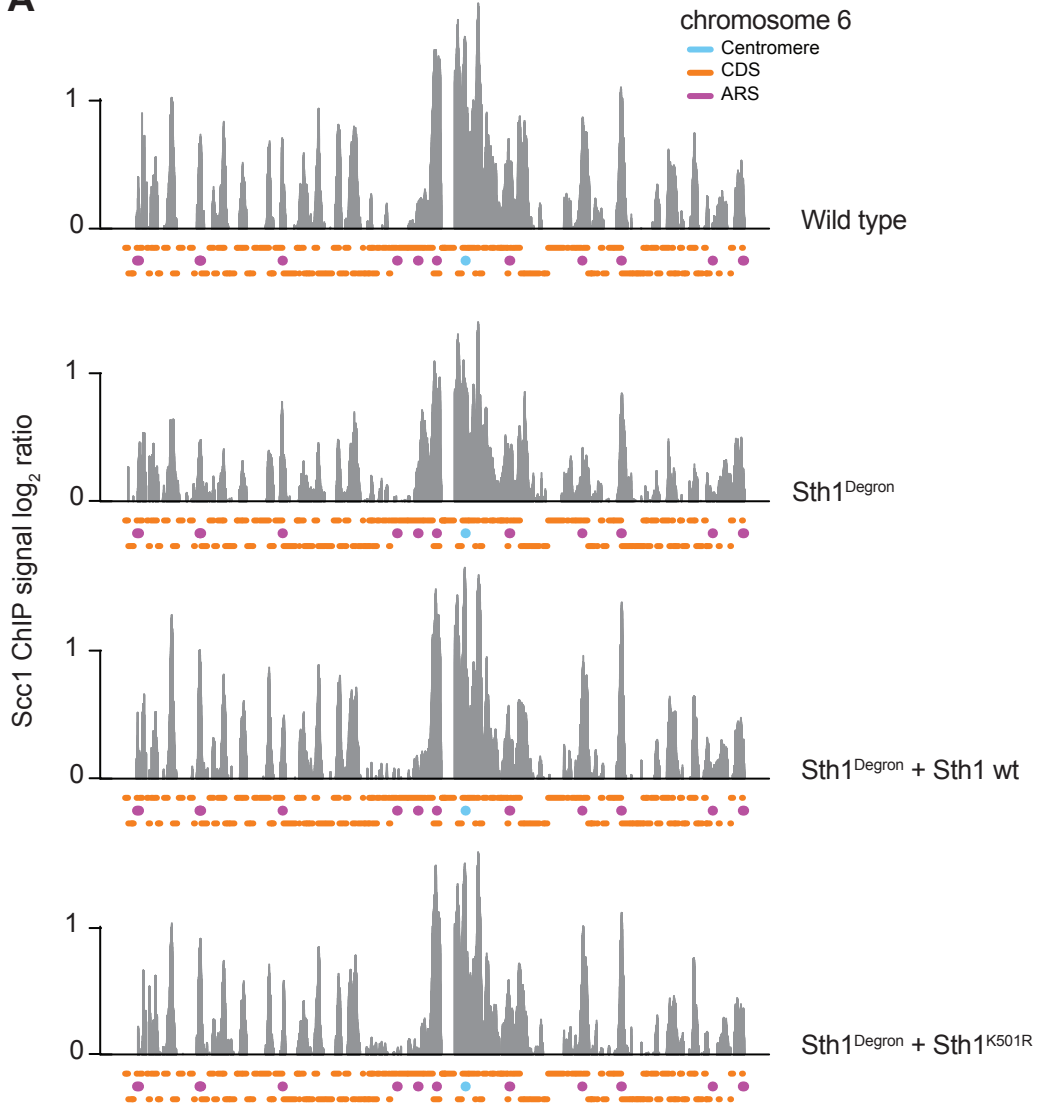

**B**

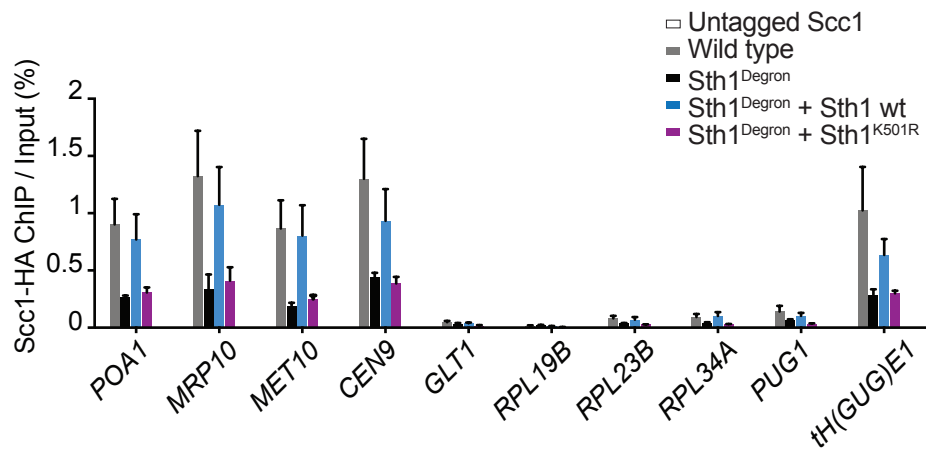



**Figure S2. Cohesin Distribution along Chromosomes following Sth1 Depletion, Related to Figure 1**

(A) Cells of the indicated genotypes were synchronized in G1, endogenous Sth1 was depleted, and released into a nocodazole-imposed mitotic arrest. ChIP analysis against HA epitope-tagged Scc1 was performed and chromatin immunoprecipitates were PCR amplified and hybridized to Affymetrix GeneChip *S. cerevisiae* tiling 1.0 R arrays. Signal intensities, relative to a whole-genome DNA sample, are shown along chromosome 6. Centromeres, replication origins and coding regions are indicated. Note that due to the PCR amplification step, the cohesin pattern does not contain quantitative information about the amount of chromosomal cohesin.

(B) as in (A) but Scc1-HA levels at three chromosome arm cohesin binding sites (*POA1*, *MRP10* and *MET10*), one centromere (*CEN9*), a negative control site (*GLT1*) and five cohesin loading sites (*RPL19B*, *RPL23B*, *RPL34A*, *PUG1*, *tH(GUG)E1*) were assessed by ChIP followed by quantitative real-time PCR. Means and SEM of three independent experiments are shown to allow a quantitative comparison of chromosomal cohesin levels. DNA recovered by ChIP from an untagged strain was also quantified but remained below the visualization limit of this graph.

Figure S3

**A**

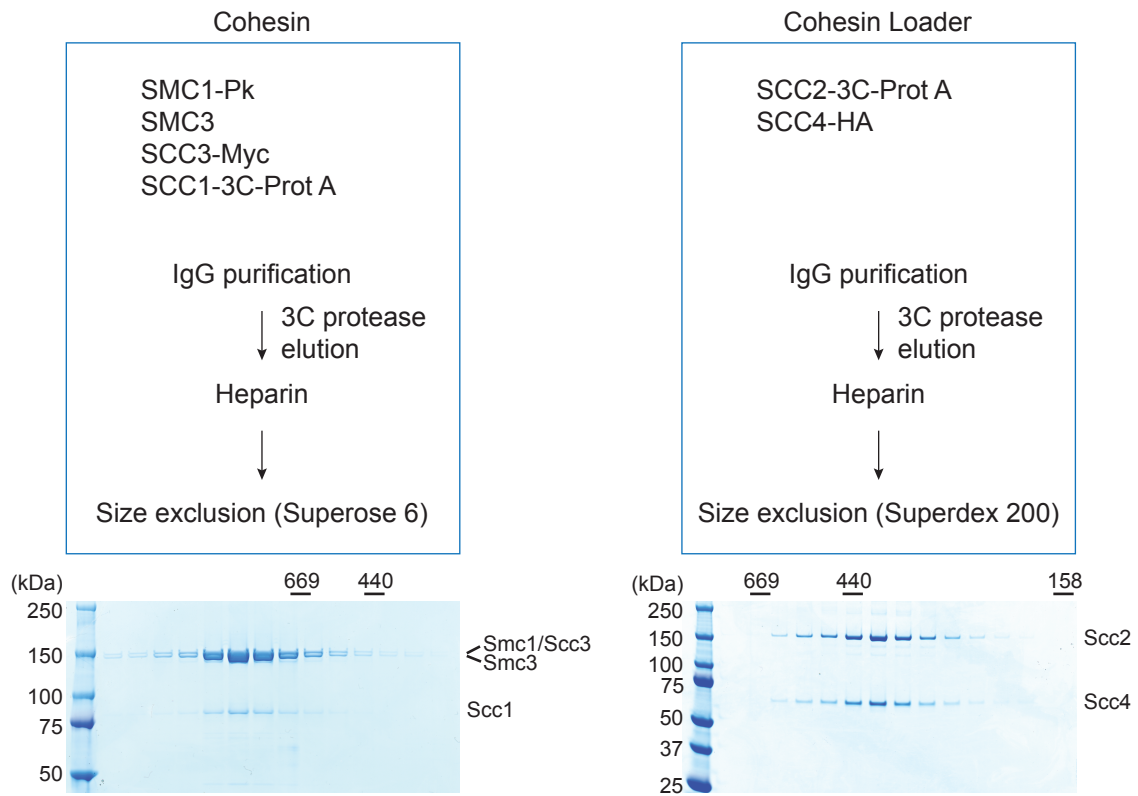

**B**

**Cohesin loading reaction**  
(Circular DNA + Cohesin + Loader + ATP)  
1h, 29 °C

↓  
**Cohesin IP (Cohesin DNA Complex on beads)**

↓  
**PstI digestion**

↓  
**Supernatant**

↓  
**Beads**

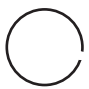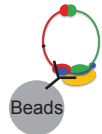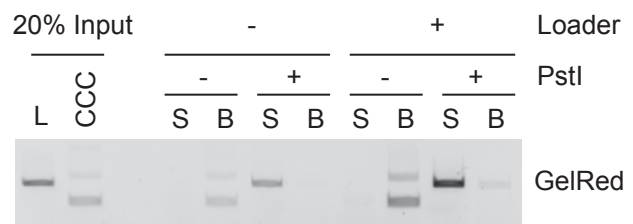

**C**

**MNase Control**

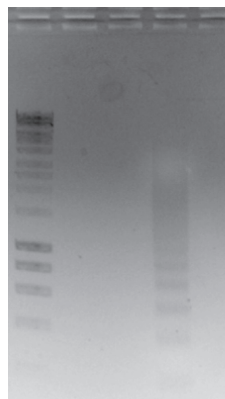

⋮  
trinucleosome  
dinucleosome  
mononucleosome

**Figure S3. Biochemical Reconstitution of Topological DNA Binding by the Budding Yeast Cohesin Ring, Related to Figure 3**

(A) Schematic of the cohesin and cohesin loader complex purification procedures. The peak fractions from the final gel filtration steps were analyzed by SDS-PAGE followed by Coomassie Blue staining.

(B) Schematic and gel image of a cohesin loading experiment, followed by DNA release by DNA linearization using the PstI restriction endonuclease to confirm the topological nature of DNA binding. The input is shown in its covalently closed circular (CCC) form, as well as following linearization (L). Supernatant (S) and beads (B) fractions of the cohesin pulldown are shown from reactions in the presence or absence of the cohesin loader, with or without PstI digestion.

(C) Micrococcal nuclease digestion of the chromatinized plasmid used as a template in the cohesin loading reaction shown in Figure 3B, confirming efficient and even nucleosome assembly.

Figure S4

**A**

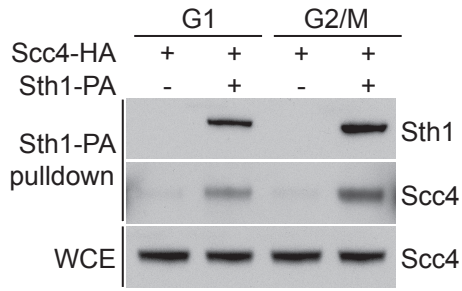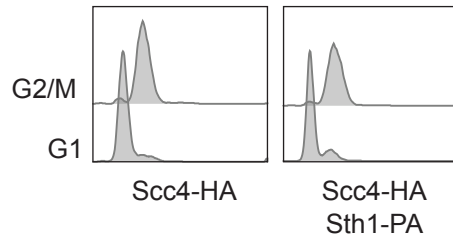

**B**

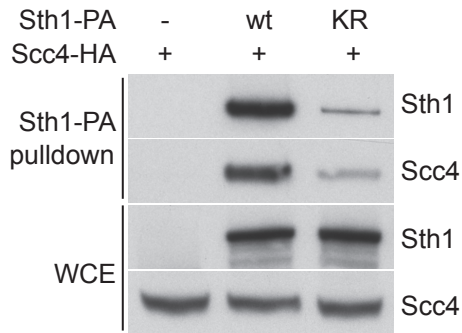

**C**

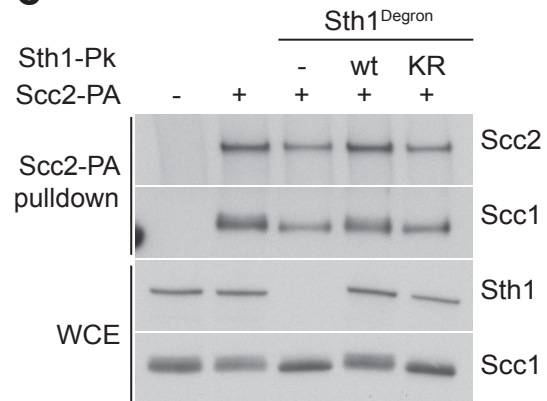

**Figure S4. Additional Interaction Analyses between RSC, Cohesin Loader and Cohesin, Related to Figure 4**

(A) RSC interaction with the cohesin loader in G1 and mitosis. As in Figure 4A, but cell extracts were prepared from aliquots of a culture arrested in G1, or following release into nocodazole-imposed mitotic arrest. FACS analysis of DNA content is shown to confirm cell cycle synchrony.

(B) Sth1<sup>K501R</sup> interacts with the cohesin loader. Cell extracts were prepared, following depletion of endogenous Sth1, from Sth1<sup>Degron</sup> strains that expressed protein A-tagged wild type Sth1 or Sth1<sup>K501R</sup>. Sth1 was adsorbed to IgG beads and coprecipitation of Scc4 was analyzed by immunoblotting. Despite similar expression levels, protein A pulldown of Sth1<sup>K501R</sup> was reproducibly less efficient compared to wild type Sth1. We do not know the reason for this difference. Based on the respective levels of Sth1 or Sth1<sup>K501R</sup> pulldown, coprecipitation of Scc4 appeared equally efficient.

(C) RSC-independent interaction between cohesin and the cohesin loader. Cell extracts were prepared from the indicated strains following Sth1 depletion, or from the indicated control strains. Protein A-tagged Scc2 was precipitated and coprecipitation of Scc1 was analyzed by immunoblotting.

Figure S5

**A**

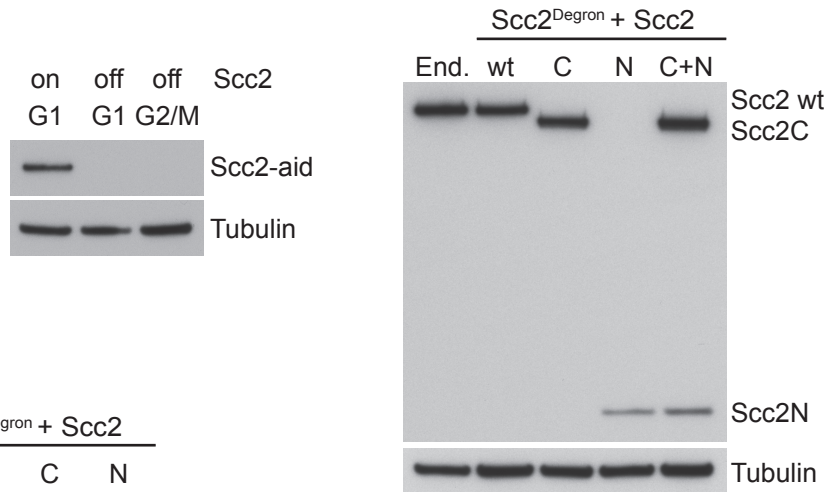

**B**

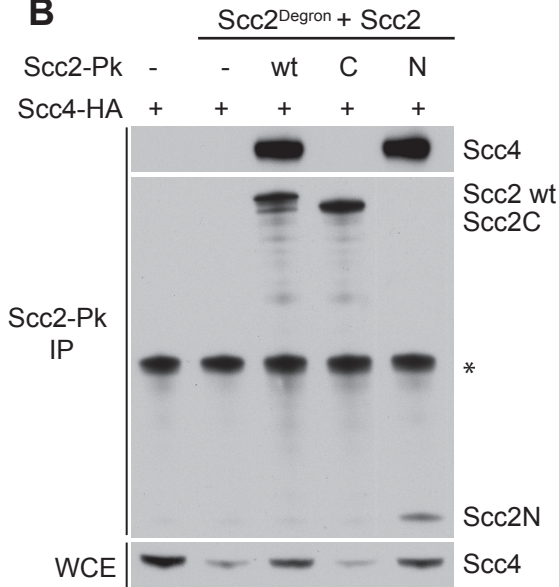

**C**

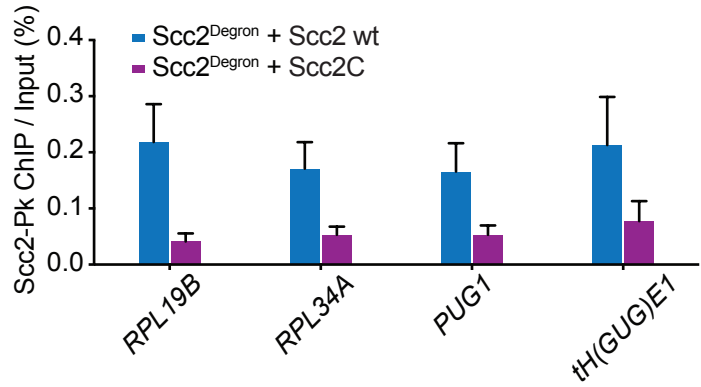

**D**

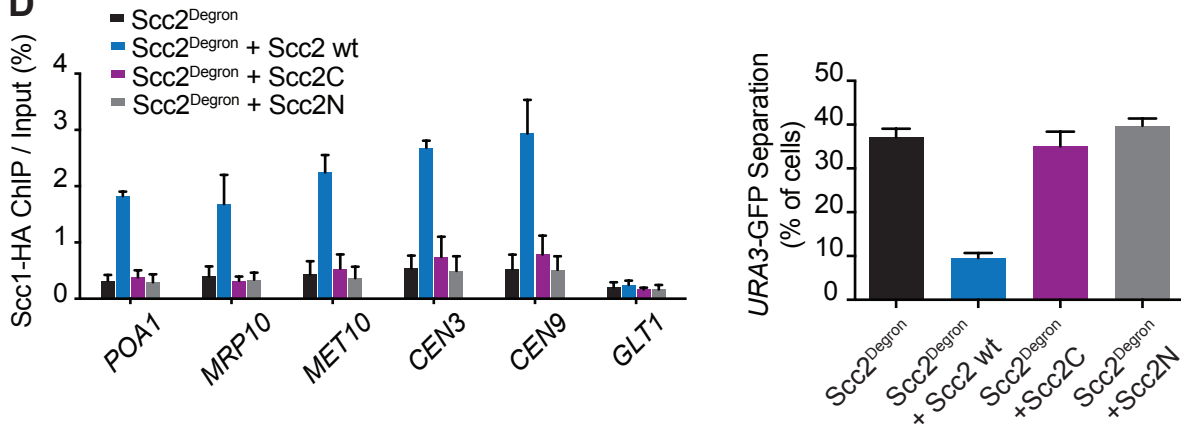

**E**

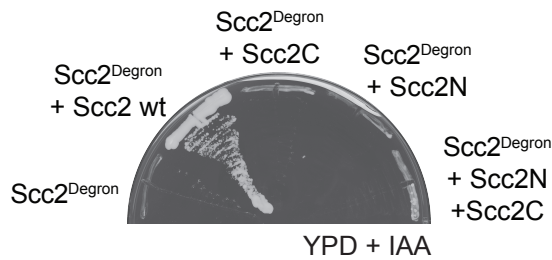

**Figure S5. Additional Characterization of the Cohesin Loader Modules, Related to Figure 5**

(A) Endogenous Scc2 levels before and after depletion during G1 arrest and release into nocodazole-imposed G2/M arrest were monitored by immunoblotting with an anti-aid tag antibody (left). Immunoblot analysis of the various Scc2 fragments, fused to a Pk epitope tag, expressed under control of the Scc2 promoter at its endogenous or from an ectopic locus (right).

(B) Scc2N, but not Scc2C, interacts with and stabilizes Scc4. Cell extracts of the indicated strains were prepared after G1 arrest, endogenous Scc2 depletion and release into nocodazole-imposed mitotic arrest. The different Pk epitope-tagged Scc2 fragments were precipitated and copurification of Scc4 was analyzed by immunoblotting.

(C) Scc2C is undetectable at cohesin loading sites. Wild type Scc2 and Scc2C levels, following endogenous Scc2 depletion as in (A), were compared at four cohesin loading sites by ChIP followed by quantitative real-time PCR. Means and SEM of five independent experiments are shown.  $Scc2^{Degron} + Scc2C$   $p < 0.01$ ; two-way ANOVA test compared to  $Scc2^{Degron} + Scc2$  wt.

(D) Neither Scc2C nor Scc4-Scc2N suffices for cohesin loading. Endogenous Scc2 was depleted in G1 before cells expressing the indicated Scc2 variants were released into nocodazole-imposed mitotic arrest. Cohesin levels at five cohesin binding sites and a negative control site were analyzed by ChIP followed by quantitative real-time PCR. Means and SEM of three independent experiments are shown.  $Scc2^{Degron} + Scc2$  wt  $p < 0.01$ ;  $Scc2^{Degron} + Scc2C$  and  $Scc2^{Degron} + Scc2N$   $p$  not significant; two-way ANOVA test compared to  $Scc2^{Degron}$ . Sister chromatid cohesion at the GFP-marked *URA3* locus was scored in a similar experiment. The means and SEM of three independent experiments are shown.  $Scc2^{Degron} + Scc2$  wt  $p < 0.01$ ;  $Scc2^{Degron} + Scc2C$  and  $Scc2^{Degron} + Scc2N$   $p$  not significant; Student's *t*-test compared to  $Scc2^{Degron}$ .

(E) Scc4-Scc2N and Scc2C must be linked to support cell growth. The ability of the respective Scc2 variants to restore viability following  $Scc2^{Degron}$  depletion was tested by streaking the indicated strains on rich YPD medium containing methionine, supplemented with indole-3-acetic acid (IAA).

Figure S6

**A**

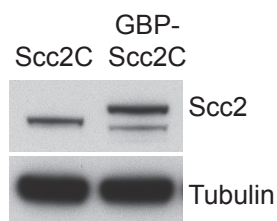

**B**

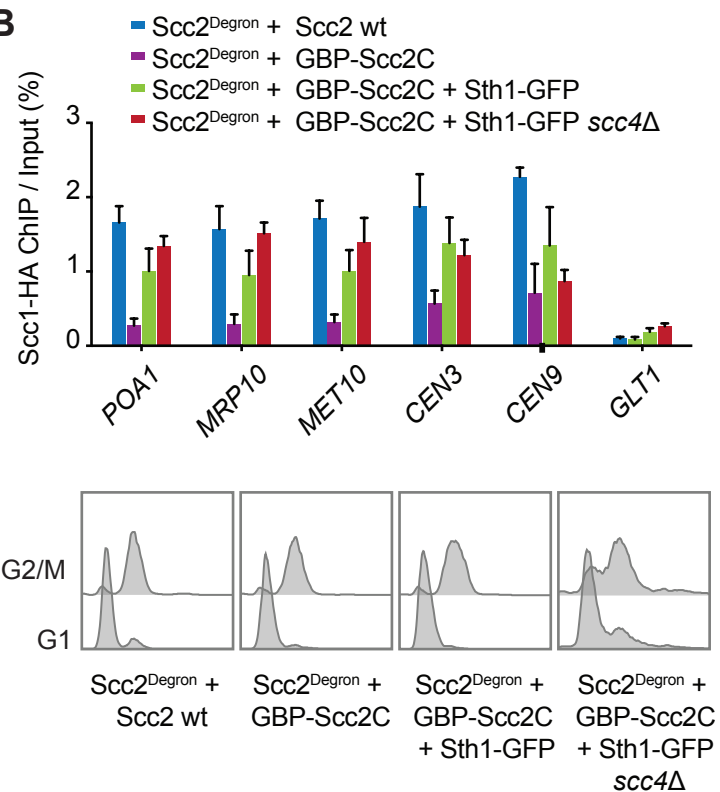

**C**

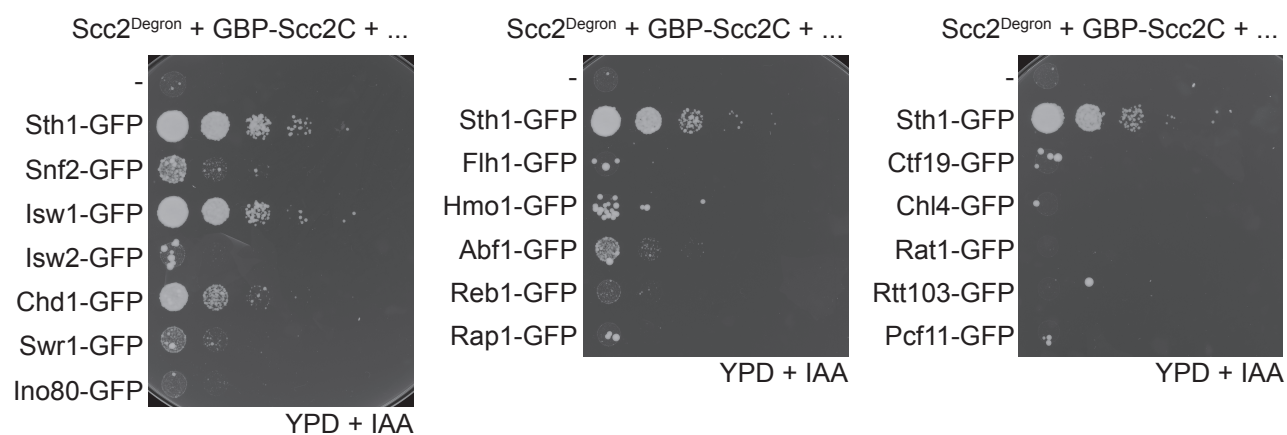



**Figure S6. Additional Data to Characterize Engineered Cohesin Loading by GBP-Sc2C, Related to Figure 6**

(A) Expression of GBP-Sc2C, next to Sc2C, was analyzed by immunoblotting against the C-terminal Pk epitope tags contained on both proteins. The faster migrating GBP-Sc2C band is likely the product of proteolytic cleavage at a flexible linker sequence between the GBP tag and Sc2C, that might be sensitive to proteases.

(B) Sc4 is dispensable for cohesin loading by GBP-Sc2C in conjunction with Sth1-GFP. Cohesin loading onto chromosomes was assessed as in Figure 6C, but including a strain lacking Sc4. Means and SEM of three independent experiments are shown. Sc2<sup>Degron</sup> + Sc2 wt, Sc2<sup>Degron</sup> + GBP-Sc2C + Sth1-GFP and Sc2<sup>Degron</sup> + GBP-Sc2C + Sth1-GFP *scc4*Δ  $p < 0.01$ ; two-way ANOVA test compared to the Sc2<sup>Degron</sup> + GBP-Sc2C strain. FACS analysis of DNA content confirmed the cell cycle stage at the time of endogenous Sc2 depletion and the mitotic arrest when the ChIP samples were taken. Note the reduced synchrony of cells lacking Sc4, suggesting that the chronic absence of Sc4 compromises cell proliferation.

(C) Cell growth as supported by GBP-Sc2C in conjunction with various putative chromatin receptor-GFP fusions. 10-fold serial dilutions of the indicated strains were spotted on YPD + IAA medium to deplete endogenous Sc2.

Table S2. **qPCR primers used in this study**

| Name        | Sequence (5' -3')         |
|-------------|---------------------------|
| POA1-F      | AAACGGCCACATCAAATACC      |
| POA1-R      | TCCAAGGGACTCCGAATATG      |
| MRP10-F     | ACCCCCTCTTCCCAGACTAA      |
| MRP10-R     | CCAGCACATTTAGGGCTCAT      |
| MET10-F     | ACTTGTGTGGCCCTACTTGG      |
| MET10-R     | CGACTTTGATGCCTCTTTCC      |
| CEN3-F      | CGCCACTTTAACAATGTGC       |
| CEN3-R      | GCAGAACCACCGTAGCAGTT      |
| CEN9-F      | TGTCACCTGGCTGTTTTGAG      |
| CEN9-R      | TGGTAATGTCAGCTGTGGA       |
| GLT1-F      | TTTGACCCCAGCACATGTTA      |
| GLT1-F      | GGGTGTGGAGTTTGTGGTCT      |
| RPL23B-F    | CCGTCAAGCTAAGTCTTGGAGAAG  |
| RPL23B-R    | CCTTAGGATTAGCGATGACACCAG  |
| RPL34A-F    | GTCTTGTGGGTCTTGGAAACAG    |
| RPL34A-R    | CAAAGTGTGGTACTGTGGTAG     |
| PUG1-F      | GCGGCAAGCTCATCCTAAAT      |
| PUG1-R      | CCCACAATTGATTCGGTAGG      |
| tH(GUG)E1-F | GAAACCCTGGTTTCGATTCTAGGAG |
| tH(GUG)E1-R | GCTCTCATGATCACCACATCTGAC  |
| CIN8-F      | AGGGCACAACACTAGATAAACAGCA |
| CIN8-R      | GGGCCATTTGCATTACCTCAGTCA  |

Table S3. **Plasmids used in this study**

| Name   | Description                                      | Purpose                                                                              | Source                     |
|--------|--------------------------------------------------|--------------------------------------------------------------------------------------|----------------------------|
| pSM15  | YIplac204-Sth1-PK <sub>3</sub>                   | Integration of wild type Sth1-PK <sub>3</sub> at <i>TRP1</i> locus                   | This study                 |
| pSM16  | YIplac204-Sth1K <sup>501R</sup> -PK <sub>3</sub> | Integration of wild type Sth1 <sup>K501R</sup> -PK <sub>3</sub> at <i>TRP1</i> locus | This study                 |
| pSM32  | YIplac204-Sth1-HA <sub>6</sub>                   | Integration of wild type Sth1-HA <sub>6</sub> at <i>TRP1</i> locus                   | This study                 |
| pSM33  | YIplac204-Sth1K <sup>501R</sup> -HA <sub>6</sub> | Integration of wild type Sth1 <sup>K501R</sup> -HA <sub>6</sub> at <i>TRP1</i> locus | This study                 |
| pSM51  | YIplac204-Sth1-PA <sub>2</sub>                   | Integration of wild type Sth1-PA <sub>2</sub> at <i>TRP1</i> locus                   | This study                 |
| pSM52  | YIplac204-Sth1K <sup>501R</sup> -PA <sub>2</sub> | Integration of wild type Sth1 <sup>K501R</sup> -PA <sub>2</sub> at <i>TRP1</i> locus | This study                 |
| pCCD51 | pBS-KSII-cut2-ARS1                               | Substrate for the cohesin loading assay                                              | This study                 |
|        | pCDFduet.H2A-H2B                                 | Histone purification                                                                 | Kurat <i>et al.</i> , 2017 |
|        | pETduet.H3-H4                                    | Histone purification                                                                 | Kurat <i>et al.</i> , 2017 |
| pCFK1  | pGEX-Nap1                                        | Nap1 purification                                                                    | Kurat <i>et al.</i> , 2017 |
| pSM2   | pRS303-Scc2-PK <sub>3</sub>                      | Integration of wild type Scc2-PK <sub>3</sub> at <i>HIS3</i> locus                   | This study                 |
| pSM4   | pRS303-Scc2-C-PK <sub>3</sub>                    | Integration of Scc2-C-PK <sub>3</sub> at <i>HIS3</i> locus                           | This study                 |
| pSM8   | pRS303-Scc2-N-PK <sub>3</sub>                    | Integration of Scc2-N-PK <sub>3</sub> at <i>HIS3</i> locus                           | This study                 |
| pSM11  | pRS304-Scc2-N-PK <sub>3</sub>                    | Integration of Scc2-N-PK <sub>3</sub> at <i>TRP1</i> locus                           | This study                 |
| pSM30  | pRS303-Scc2-HA <sub>6</sub>                      | Integration of wild type Scc2-HA <sub>6</sub> at <i>HIS3</i> locus                   | This study                 |
| pSM31  | pRS303-Scc2-C-HA <sub>6</sub>                    | Integration of Scc2-C-HA <sub>6</sub> at <i>HIS3</i> locus                           | This study                 |
| pSM34  | pRS303-Scc2-N-HA <sub>6</sub>                    | Integration of Scc2-N-HA <sub>6</sub> at <i>HIS3</i> locus                           | This study                 |
| pSM50  | pRS303-GBP-Scc2-C-PK <sub>3</sub>                | Integration of Scc2-GBP-C-PK <sub>3</sub> at <i>HIS3</i> locus                       | This study                 |
