# Supplementary material for: A Role for Chromatin Remodeling in Cohesin Loading onto Chromosomes
Source: PubMed Central journal article supplement (PMC6527865; doi:10.1016/j.molcel.2019.02.027), 2019-05-16
Supplement: mmc3.pdf [file mmc3.pdf]

# Molecular Cell

## A Role for Chromatin Remodeling in Cohesin Loading onto Chromosomes

### Graphical Abstract

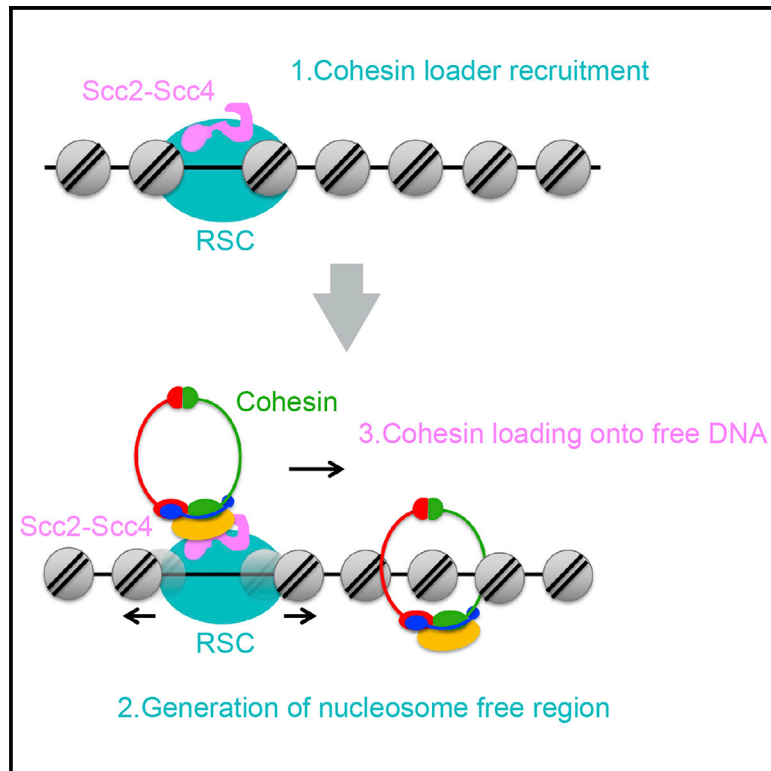

### Authors

Sofía Muñoz, Masashi Minamino,  
Corella S. Casas-Delucchi,  
Harshil Patel, Frank Uhlmann

### Correspondence

frank.uhlmann@crick.ac.uk

### In Brief

Despite our increasing understanding of cohesin, how this essential protein complex accesses chromosomes is incompletely understood. Muñoz et al. provide insight into this by revealing that a molecular machine that mobilizes nucleosomes assists with cohesin loading and defines the DNA entry points for cohesin in the context of chromatin.

### Highlights

- Nucleosomes inhibit cohesin loading
- Chromatin remodeling by RSC promotes cohesin loading
- RSC recruits Scc2-Scc4 to chromatin independent of remodeling
- Linking Scc2-C to various chromatin remodelers recreates cohesin loading

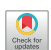

# A Role for Chromatin Remodeling in Cohesin Loading onto Chromosomes

Sofía Muñoz,<sup>1</sup> Masashi Minamino,<sup>1</sup> Corella S. Casas-Delucchi,<sup>2</sup> Harshil Patel,<sup>3</sup> and Frank Uhlmann<sup>1,4,\*</sup>

<sup>1</sup>Chromosome Segregation Laboratory, The Francis Crick Institute, 1 Midland Road, London NW1 1AT, UK

<sup>2</sup>Chromosome Replication Laboratory, The Francis Crick Institute, 1 Midland Road, London NW1 1AT, UK

<sup>3</sup>Bioinformatics and Biostatistics Science Technology Platform, The Francis Crick Institute, 1 Midland Road, London NW1 1AT, UK

<sup>4</sup>Lead Contact

\*Correspondence: [frank.uhlmann@crick.ac.uk](mailto:frank.uhlmann@crick.ac.uk)

<https://doi.org/10.1016/j.molcel.2019.02.027>

## SUMMARY

Cohesin is a conserved, ring-shaped protein complex that topologically embraces DNA. Its central role in genome organization includes functions in sister chromatid cohesion, DNA repair, and transcriptional regulation. Cohesin loading onto chromosomes requires the Scc2-Scc4 cohesin loader, whose presence on chromatin in budding yeast depends on the RSC chromatin remodeling complex. Here we reveal a dual role of RSC in cohesin loading. RSC acts as a chromatin receptor that recruits Scc2-Scc4 by a direct protein interaction independent of chromatin remodeling. In addition, chromatin remodeling is required to generate a nucleosome-free region that is the substrate for cohesin loading. An engineered cohesin loading module can be created by fusing the Scc2 C terminus to RSC or to other chromatin remodelers, but not to unrelated DNA binding proteins. These observations demonstrate the importance of nucleosome-free DNA for cohesin loading and provide insight into how cohesin accesses DNA during its varied chromosomal activities.

## INTRODUCTION

Following DNA replication, sister chromatids are held together in a process known as sister chromatid cohesion. This is essential for faithful chromosome segregation during cell divisions. Sister chromatid cohesion is achieved by cohesin, a ring-shaped protein complex that topologically entraps both sister chromatids (Nasmyth and Haering, 2009; Peters and Nishiyama, 2012; Uhlmann, 2016). The cohesin complex consists of two structural maintenance of chromosomes (SMC) proteins, Smc1 and Smc3, characterized by long flexible coiled coils that dimerize at a hinge domain. At their far end lie globular ATPase heads that engage in the presence of ATP and are bridged by a kleisin subunit, Scc1, to complete the ring. Additional HEAT repeats containing subunits, Scc3 and Pds5, associate with the kleisin as well as a stoichiometric regulator, Wapl. Apart from its prominent role in

sister chromatid cohesion, cohesin takes part in many other chromosomal processes, including DNA repair and organization of the genome into chromatin loops (Dorsett and Ström, 2012; van Ruiten and Rowland, 2018).

Cohesin association with chromatin depends on a second protein complex comprised of the Scc2 and Scc4 subunits (Ciosk et al., 2000). This cohesin loader complex makes multiple contacts with both cohesin and DNA that facilitate topological cohesin loading *in vitro* (Murayama and Uhlmann, 2014). In the presence of DNA, the cohesin loader stimulates cohesin's ATPase, which forms part of the DNA loading reaction. Structural and biochemical studies have shown that the cohesin loader consists of two functional modules (Chao et al., 2015; Hinshaw et al., 2015; Kikuchi et al., 2016; Takahashi et al., 2008). DNA and cohesin interactions reside in a C-terminal portion of Scc2 (Scc2C) that largely consists of HEAT repeats, resembling cohesin's two other HEAT subunits. Scc2C is sufficient to catalyze cohesin loading onto naked DNA *in vitro* but fails to load cohesin onto chromosomes *in vivo*. Scc4 forms a tetratricopeptide repeat superhelix that wraps around the Scc2 N terminus (Scc4-Scc2N). This module recruits the cohesin loader to chromatin *in vivo* (Chao et al., 2015; Hinshaw et al., 2015). Scc4-Scc2N has no intrinsic affinity for DNA, suggesting that its interaction with chromatin occurs via a protein receptor.

*In vitro*, Scc2-Scc4 loads cohesin in a DNA sequence-independent manner (Murayama and Uhlmann, 2014), whereas *in vivo* cohesin is loaded at specific chromosomal locations, at centromeres and promoters of certain highly transcribed genes (Kagey et al., 2010; Lopez-Serra et al., 2014; Petela et al., 2018; Zuin et al., 2014). From there, cohesin slides, pushed by the transcription machinery, to its final chromosomal destinations in pericentromeric regions and at sites of convergent transcriptional termination. Along human chromosomes, the CCCTC-binding factor (CTCF) forms alternative cohesin retention sites (Busslinger et al., 2017; Davidson et al., 2016; Ocampo-Hafalla et al., 2016). The chromatin features that define cohesin loading sites are incompletely understood. At budding yeast centromeres, an interaction between the inner kinetochore protein Ctf19 and a conserved surface patch on Scc4 contributes to cohesin loader recruitment. This depends on Ctf19 N-terminal phosphorylation by the Dbf4-dependent kinase (DDK) (Hinshaw et al., 2017). This pathway enhances, but is not essential for, cohesin loading at centromeres. DDK also mediates cohesin loader recruitment to pre-replicative complexes to achieve

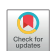

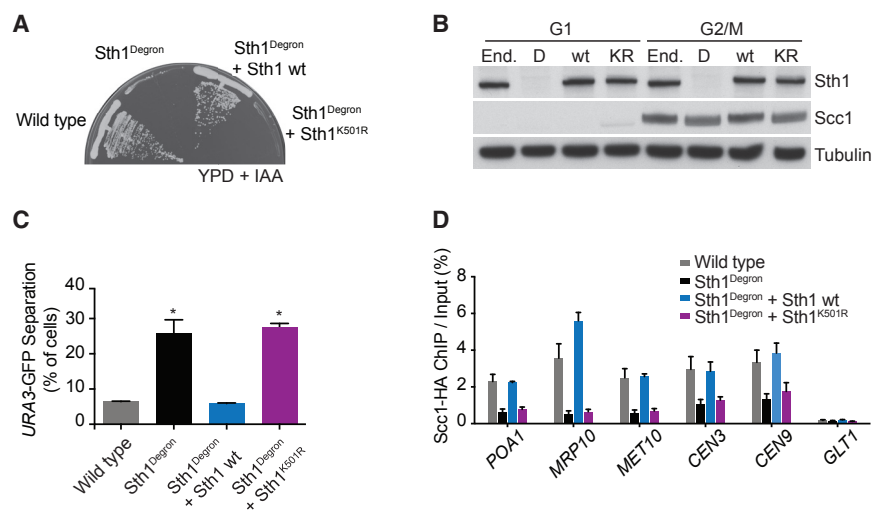

**Figure 1. Cohesin Loading Requires RSC Catalytic Activity**

(A) The ATPase mutant *Sth1* fails to restore cell viability following *Sth1* depletion. Wild-type *Sth1<sup>Degron</sup>* cells and *Sth1<sup>Degron</sup>* cells expressing wild-type *Sth1* or *Sth1<sup>K501R</sup>* were streaked onto rich yeast extract peptone dextrose (YPD) medium containing methionine to repress *Sth1<sup>Degron</sup>* expression and indole-3-acetic acid (IAA) to promote its degradation.

(B) Ectopic *Sth1* and *Sth1<sup>K501R</sup>* are expressed at similar levels as endogenous *Sth1*. Cells of the indicated genotypes were synchronized in G1, endogenous *Sth1* was depleted, and cells were released into nocodazole-imposed mitotic arrest. Levels of *Sth1* and of the cohesin subunit *Scc1* were monitored by immunoblot. Tubulin served as a loading control. End., endogenous *Sth1*; D, *Sth1<sup>Degron</sup>*; wt, wild-type (*wt*), *Sth1<sup>Degron</sup> + wt*; KR, *Sth1<sup>Degron</sup> + Sth1<sup>K501R</sup>*.

(C) RSC catalytic activity is required for sister chromatid cohesion; as in (B), but sister chromatid

cohesion at the GFP-marked *URA3* locus was scored. Means and SEM of three independent experiments are shown. *Sth1<sup>Degron</sup>* and *Sth1<sup>Degron</sup> + Sth1<sup>K501R</sup>*,  $p < 0.01$ ; *Sth1<sup>Degron</sup> + Sth1 wt*,  $p$  not significant; Student's  $t$  test compared with the wild-type strain.

(D) RSC catalytic activity promotes cohesin loading; as in (B), but *Scc1* levels at three chromosome arm cohesin binding sites (*POA1*, *MRP10*, and *MET10*), two centromeres (*CEN3* and *CEN9*), and a negative control site (*GLT1*) were measured by ChIP, followed by real-time qPCR. Means and SEM of three independent experiments are shown. *Sth1<sup>Degron</sup>* and *Sth1<sup>Degron</sup> + Sth1<sup>K501R</sup>*,  $p < 0.01$ ; *Sth1<sup>Degron</sup> + Sth1 wt*,  $p$  not significant; two-way ANOVA test compared with the wild-type strain.

See also Figure S1 for a schematic of cell synchronization and cell cycle progression analysis by fluorescence-activated cell sorting (FACS) analysis of DNA content as well as Figure S2 for additional ChIP microarray and quantitative analyses of the cohesin distribution.

cohesin loading onto transcriptionally inactive chromosomes in *Xenopus* cell-free extracts (Takahashi et al., 2008). Despite this insight, the nature of the essential pathway that loads cohesin in the chromatin context of transcriptionally active chromosome arms remains incompletely understood.

Comparison of *Scc2-Scc4* binding sites with those of other chromatin factors in budding yeast revealed an overlap with the remodels the structure of chromatin' (RSC) chromatin remodeling complex (Lopez-Serra et al., 2014). RSC is a yeast ortholog of the human BAF and PBAF complexes, members of the conserved SWI/SNF family of ATP-dependent chromatin remodelers. They are large multisubunit protein complexes that push DNA along the histone octamer, leading to nucleosome sliding or eviction. Either outcome opens up chromatin and renders it accessible to factors involved in various aspects of DNA metabolism, including transcription and DNA repair (Clapier et al., 2017; Lorch and Kornberg, 2017). RSC maintains broad nucleosome-free regions at promoters where the cohesin loader is found (Lopez-Serra et al., 2014). However, it is not yet known how RSC recruits the cohesin loader or whether chromatin remodeling forms part of the cohesin loading reaction.

Here we investigate the role of RSC in cohesin loading onto chromosomes. This reveals a dual role for this chromatin remodeler. First, RSC serves as the chromatin receptor of the cohesin loader by engaging in a direct protein interaction with the *Scc2* and *Scc4* subunits. This recruitment role does not require chromatin remodeling. In addition, chromatin remodeling provides nucleosome-free DNA, which is the required substrate for cohesin loading. The cohesin loading function of *Scc2C* can be reassigned from RSC to other chromatin remodelers but not to other DNA binding proteins. This establishes a close relationship

between chromatin remodeling and cohesin loading onto chromosomes, describing the entry point by which cohesin accesses DNA in the context of chromatin.

## RESULTS

### The RSC ATPase Is Required for Cohesin Loading

RSC chromatin remodeler inactivation leads to loss of cohesin from chromosomes and defective sister chromatid cohesion as well as reduced *Scc2-Scc4* levels at cohesin loading sites (Baetz et al., 2004; Huang et al., 2004; Lopez-Serra et al., 2014). To investigate whether chromatin remodeling by RSC is required for these functions, we conditionally depleted *Sth1*, its essential catalytic RecA-type ATPase subunit. We achieved this by replacing the *STH1* promoter with the methionine-repressible *MET3* promoter, combined with *Sth1* fusion to an auxin-inducible degron tag (Nishimura et al., 2009). In this background, we introduced an additional copy of either the wild-type *STH1* gene or *sth1<sup>K501R</sup>* carrying an amino acid substitution within the ATP binding motif that abrogates ATP hydrolysis (Du et al., 1998). As expected, *Sth1* depletion resulted in lethality. Cell growth could be rescued by expression of wild-type *Sth1* but not *Sth1<sup>K501R</sup>* (Figure 1A).

For the following experiments, we depleted *Sth1* in G1-arrested cells and released cells to progress through one cell cycle until they were arrested again in G2/M by nocodazole treatment (Figures S1A and S1B). The absence of functional *Sth1* reproducibly delayed DNA replication by around 15 min. Samples for analysis were taken after all cells had completed S phase. Western blotting confirmed efficient *Sth1* depletion as well as ectopic expression levels of wild-type *Sth1* or *Sth1<sup>K501R</sup>*,

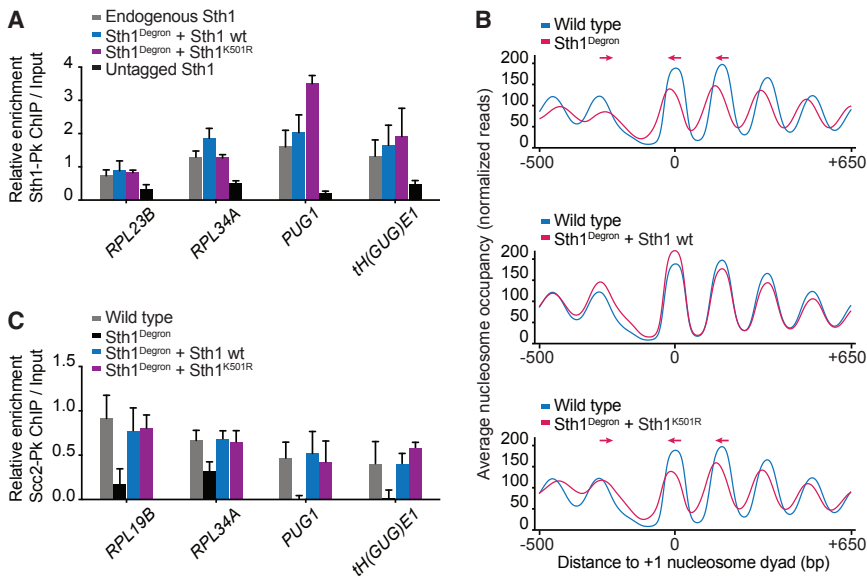

## Figure 2. RSC Recruits the Cohesin Loader Independently of Its ATPase

(A)  $Sth1^{K501R}$  is present on chromatin. Sth1 ChIP was performed in mitotic arrest following Sth1 depletion, as in Figure 1. Binding to three gene promoters (*RPL23B*, *RPL34A*, and *PUG1*) and a tRNA gene (*tH(GUG)E1*) was measured by real-time qPCR, normalized to a negative control site (*C/N8*). Means and SEM of three independent experiments are shown.  $Sth1^{Degrone} + Sth1^{wt}$  and  $Sth1^{Degrone} + Sth1^{K501R}$ , p not significant; untagged Sth1,  $p < 0.01$ ; two-way ANOVA test compared with the endogenous Sth1 strain.

(B) The Sth1 ATPase is required for chromatin remodeling. Shown are average nucleosome occupancy profiles at 4,264 genes aligned to the +1 nucleosome midpoint, comparing wild-type with  $Sth1^{Degrone}$  cells following Sth1 depletion and with  $Sth1^{Degrone}$  cells expressing either Sth1 or  $Sth1^{K501R}$ .

(C) Cohesin loader recruitment by  $Sth1^{K501R}$ . Scc2 levels were measured by ChIP, followed by real-time qPCR as in (A). Means and SEM of three independent experiments are shown.  $Sth1^{Degrone}$ ,  $p < 0.01$ ;  $Sth1^{Degrone} + Sth1^{wt}$  and  $Sth1^{Degrone} + Sth1^{K501R}$ , p not significant; two-way ANOVA test compared with the wild-type strain.

similar to endogenous Sth1 (Figure 1B). To evaluate sister chromatid cohesion, we monitored the GFP-marked *URA3* locus. Consistent with previous studies (Baetz et al., 2004; Huang et al., 2004; Lopez-Serra et al., 2014), Sth1 depletion resulted in defective sister chromatid cohesion. Cohesion was restored by expression of wild-type Sth1. In contrast,  $Sth1^{K501R}$  expression did not improve sister chromatid cohesion (Figure 1C).

We next asked whether  $Sth1^{K501R}$  failed to rescue sister chromatid cohesion because Sth1 catalytic activity is required for cohesin loading onto chromosomes. The cohesin subunit Scc1 is cleaved in anaphase and must be newly synthesized before cells enter the next round of DNA replication. We therefore first asked whether Scc1 expression is affected by Sth1 depletion. The kinetics and levels of Scc1 accumulation were indistinguishable between wild-type and Sth1-depleted cells (Figures 1B and S1C). Despite cohesin's presence, quantitative chromatin immunoprecipitation (ChIP) analysis revealed markedly reduced cohesin levels following Sth1 depletion, both at centromeres and chromosome arms (Figure 1D). We note that low cohesin levels, detectable above background, persist following Sth1 depletion. Its chromosomal distribution remained largely unaltered, indicative of a global cohesin reduction rather than redistribution because of transcriptional changes or an altered chromatin landscape (Figure S2). Full chromosomal cohesion was restored by expression of wild-type Sth1 but not  $Sth1^{K501R}$  (Figure 1D). As an independent indicator for chromosome association, we observed the electrophoretic mobility of cohesin's Scc1 subunit. Polo kinase-dependent Scc1 phosphorylation preferentially targets chromosome-bound cohesin (Hornig and Uhlmann, 2004). The corresponding mobility shift was reduced in Sth1-depleted cells and restored by wild-type Sth1 but not  $Sth1^{K501R}$  (Figure 1B). This supports the notion that efficient cohesin loading onto chromosomes depends on an active RSC ATPase.

## Cohesin Loader Recruitment Is Independent of Chromatin Remodeling

To understand how the RSC ATPase facilitates cohesin loading, we first addressed whether chromatin association of the RSC complex depends on its ATPase. We compared wild-type Sth1 and  $Sth1^{K501R}$  occupancy at four previously characterized RSC binding sites (Lopez-Serra et al., 2014; Ng et al., 2002). Ectopic wild-type Sth1 associated with these sites at levels comparable with endogenous Sth1. The same was true for  $Sth1^{K501R}$  (Figure 2A), suggesting that remodeling activity is not required for RSC chromatin recruitment.

RSC establishes a nucleosome-depleted region within budding yeast promoters, upstream of a well-positioned +1 nucleosome that contains the transcription start site. Sth1 depletion leads to narrowing of this region, as seen by micrococcal nuclease digestion of chromatin followed by high-throughput sequencing. This is accompanied by a pronounced inward shift of the flanking nucleosomes in the gene body (Figure 2B; Hartley and Madhani, 2009; Kubik et al., 2018). Expression of wild-type Sth1 restored the nucleosome-depleted region as well as the original nucleosome positioning within gene bodies. In contrast,  $Sth1^{K501R}$  was unable to change nucleosome positioning over that seen following Sth1 depletion (Figure 2B). This confirms that RSC's effect on promoter nucleosome positioning is principally mediated by its remodeling activity.

We then tested whether Scc2-Scc4 recruitment to cohesin loading sites depends on the nucleosome landscape. We measured Scc2 levels at the four cohesin loader binding sites, co-occupied by RSC, by quantitative ChIP. This analysis confirmed that cohesin loader recruitment depends on the RSC complex (Lopez-Serra et al., 2014). Scc2 occupancy was greatly reduced following Sth1 depletion. Scc2 levels were restored by expression of wild-type Sth1 and, to a similar extent,



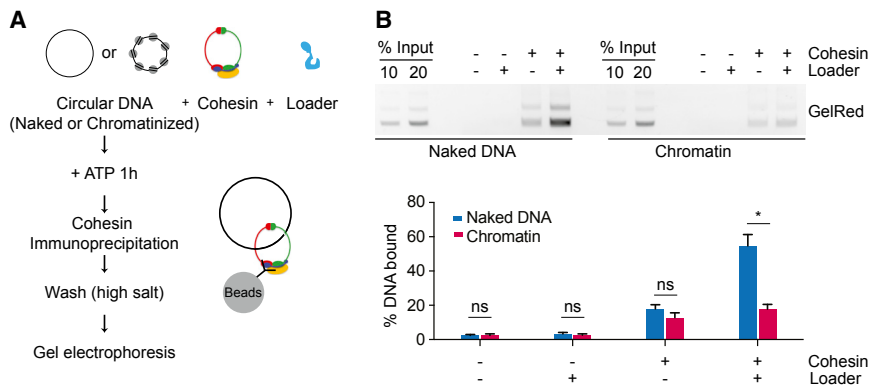

**Figure 3. Nucleosomes Inhibit *In Vitro* Cohesin Loading**

(A) Schematic of the *in vitro* cohesin loading assay. (B) Gel image showing DNA retrieved by cohesin after a loading reaction in the presence or absence of cohesin and/or the cohesin loader, using either free plasmid DNA or its chromatinized derivative as a template. The graph shows means and SEM of three independent experiments. \* $p < 0.01$ ; ns, not significant; Student's t test.

See also [Figure S3](#) for the purification of budding yeast cohesin and its cohesin loader, a demonstration of topological *in vitro* cohesin loading onto DNA, and a micrococcal nuclease control for chromatin assembly.

by expression of Sth1<sup>K501R</sup> ([Figure 2C](#)). Thus, RSC recruits the cohesin loader independent of chromatin remodeling, possibly via a direct protein interaction. We noticed that Scc2 loss following Sth1 depletion was less pronounced at two ribosomal gene promoters (*RPL19B* and *RPL34A*) compared with the *PUG1* promoter and the *tH(GUC)E1* tRNA gene. Maybe a weaker alternative Scc2-Scc4 receptor exists at ribosomal protein gene promoters. In conclusion, RSC recruits the cohesin loader independent of its ATPase, but the ATPase is required to facilitate cohesin loading.

#### Nucleosomes Interfere with Cohesin Loading *In Vitro*

To test whether nucleosome-free DNA is the required substrate for cohesin loading, we employed an *in vitro* assay that recapitulates cohesin loading onto DNA with purified proteins. We previously reconstituted topological DNA binding by the cohesin ring using fission yeast proteins ([Murayama and Uhlmann, 2014](#)). We now purified budding yeast cohesin and its loader for use in a similar assay ([Figures 3A and S3A](#); [Minamino et al., 2018](#)). Following incubation of cohesin with circular DNA in the presence of the cohesin loader and ATP, cohesin was retrieved from the reaction by immunoprecipitation. The precipitate was washed, and the recovered DNA was analyzed by gel electrophoresis. Topological DNA capture was confirmed by loss of entrapment following DNA linearization ([Figure S3B](#)).

We now converted the template plasmid used for the loading reaction into evenly spaced nucleosomes using recombinant yeast histones, the yeast histone chaperone Nap1, and the yeast ISW1a chromatin remodeler ([Kurat et al., 2017](#)). Successful nucleosome assembly was confirmed following micrococcal nuclease digestion ([Figure S3C](#)). We then used this chromatinized template next to the nucleosome-free plasmid as substrate in the cohesin loading reaction. After incubation with cohesin and ATP, a small amount of either free or chromatinized DNA was recovered. Addition of the cohesin loader markedly stimulated cohesin loading onto nucleosome-free DNA but not onto chromatinized DNA ([Figure 3B](#)). This suggests that nucleosomes interfere with cohesin loading and that the Scc2-Scc4 complex requires nucleosome-free DNA as a substrate for cohesin loading. *In vivo*, all chromosomal cohesin loading depends on the loader ([Ciosk et al., 2000](#); [Watrén et al., 2006](#)). This suggests that chromatin remodeling to access DNA forms an integral part of the cohesin loading reaction.

#### RSC Directly Interacts with Cohesin and the Cohesin Loader

RSC recruits the cohesin loader independently of chromatin remodeling. To test whether this involves a protein interaction between RSC and the cohesin loader, we fused a protein A tag to Sth1 and performed protein A pull-down experiments. We synchronized cells by  $\alpha$ -factor pheromone block and release and subsequently arrested them in G2/M by nocodazole treatment, a cell cycle stage when both cohesin and the cohesin loader are present. Sth1 pull-down resulted in clearly detectable co-precipitation of Scc4 ([Figure 4A](#)). To test whether this interaction depended on cohesin, we included an experiment in which Scc1 expression was repressed under control of the methionine-repressible *MET3* promoter during and following the  $\alpha$ -factor block. In the absence of Scc1, Sth1 still co-precipitated Scc4, albeit with somewhat reduced efficiency. We reached a similar conclusion when we compared Scc4-Sth1 co-precipitation in G2/M cells with cells arrested in G1, when little cohesin is present ([Figure S4A](#)). Consistent with the expectation that the RSC-cohesin loader interaction is independent of chromatin remodeling, Sth1<sup>K501R</sup> also co-precipitated Scc4 ([Figure S4B](#)).

Because cohesin appeared to stabilize the RSC-cohesin loader interaction, RSC might also interact with cohesin. Indeed, a similar experimental approach revealed co-precipitation of the cohesin subunit Scc1 with Sth1 ([Figure 4B](#)). This interaction was reduced, but remained detectable, when Scc2 was depleted. To complete the interaction analysis, we confirmed the previously known interaction between cohesin and the cohesin loader and found that it is unaffected by the presence or absence of Sth1 ([Figure S4C](#)). Taken together, these findings establish three way interactions between RSC, cohesin, and the cohesin loader.

To decide whether RSC directly interacts with the cohesin loader and cohesin or whether the interactions are mediated by additional binding partners, we purified the RSC complex from budding yeast ([Figure 4C](#); [Wittmeyer et al., 2004](#)). Pull-down of the purified cohesin loader led to co-purification of RSC both in the presence or absence of cohesin ([Figure 4D](#)). Similarly, cohesin pull-down demonstrated a direct interaction with RSC in both the presence or absence of the cohesin loader ([Figure 4E](#)). RSC, the cohesin loader, and cohesin were purified in the presence of benzonase, and the interaction analyses were additionally supplemented with benzonase, suggesting

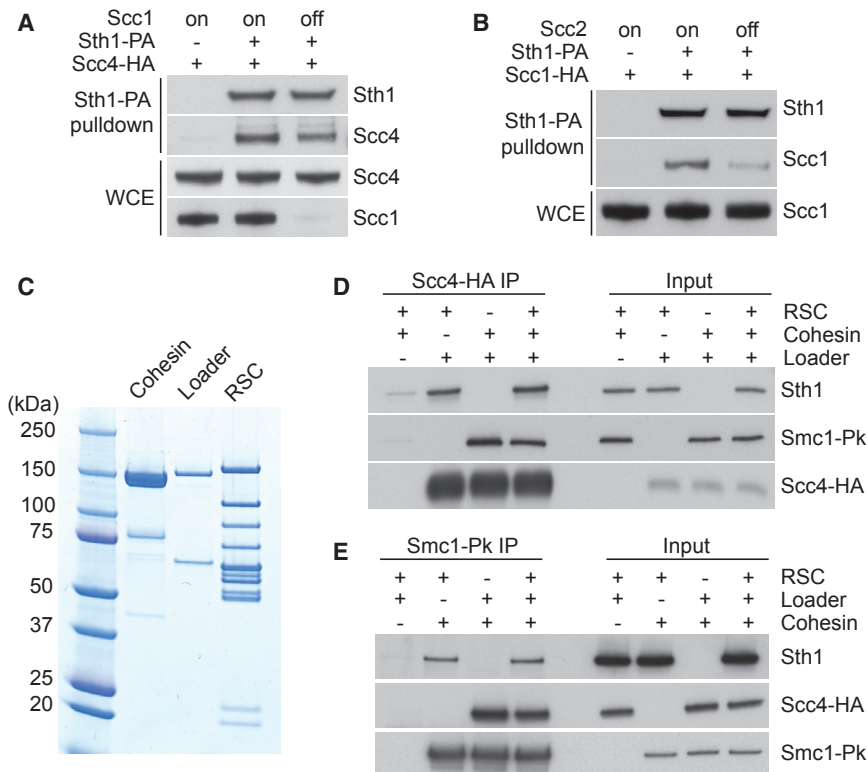

**Figure 4. RSC, Cohesin, and the Cohesin Loader Interact Directly**

(A) Interaction between Sth1 and Scc4. Cells were synchronized in G1 and released into nocodazole-imposed mitotic arrest. Scc1 was depleted in one culture in G1 by methionine-induced promoter repression. Cell extracts were prepared, and protein A-tagged Sth1 was precipitated. Co-precipitation of Scc4 was analyzed by immunoblotting.

(B) Interaction between Sth1 and cohesin; as in (A), but co-precipitation of the cohesin subunit Scc1 with protein A-tagged Sth1 was evaluated by immunoblotting. Scc2 was depleted in one culture by combination of promoter repression and an auxin-inducible degron.

(C) Coomassie-stained gel showing purified cohesin, cohesin loader, and RSC chromatin remodeling complexes.

(D) RSC and the cohesin loader interact directly. Equimolar amounts of RSC, cohesin, and cohesin loader were mixed as indicated. The cohesin loader was immunoprecipitated by its hemagglutinin (HA) epitope-tagged Scc4 subunit, and the co-precipitation of RSC or cohesin was analyzed by immunoblotting.

(E) RSC and cohesin interact directly. Interaction analyses were performed as in (D), but cohesin was immunoprecipitated by its Pk epitope-tagged Smc1 subunit.

See also Figure S4 for a comparison of the Sth1-Scc4 interaction between G1 and mitotic cells, an interaction assay using Sth1<sup>K501R</sup>, and an analysis of the cohesin-cohesin loader interaction.

that direct protein interactions take place between RSC, the cohesin loader, and cohesin.

### Both Scc4 and Scc2 Contribute to the RSC Interaction

Structural and biochemical studies have revealed a functional modularity of the cohesin loader (Chao et al., 2015; Hinshaw et al., 2015; Takahashi et al., 2008). To analyze which cohesin loader module mediates the RSC interaction, we used strains in which endogenous Scc2 could be depleted by combined promoter repression and auxin-mediated degradation. In this background, we expressed either full-length Scc2 or its two separate functional units, Scc2N or Scc2C (Figures 5A and S5A). As expected, full-length Scc2 or Scc2N co-immunoprecipitated Scc4 with equal efficiency whereas Scc2C did not. Scc4 levels in cells lacking Scc2 or expressing Scc2C were noticeably reduced, suggesting that Scc4 must bind to Scc2N for stability (Figure S5B). Although Scc2C is sufficient to catalyze cohesin loading onto naked DNA *in vitro* (Minamino et al., 2018; Murayama and Uhlmann, 2014), it fails to bind chromatin, load cohesin, or support sister chromatid cohesion *in vivo* (Figures S5C and S5D; Chao et al., 2015).

We wondered whether Scc2C is unable to load cohesin onto DNA *in vivo* because it fails to interact with RSC. To address this, we used protein A pull-down of Sth1 in cells expressing either full-length Scc2 or Scc2C. Both Scc2 and Scc4 co-precipitated with Sth1 in cells expressing full-length Scc2, but the interaction was markedly reduced in cells expressing Scc2C (Figure 5B). When using purified proteins, RSC interacted with

the Scc2-Scc4 complex but not with Scc2C (Figure 5C). These results suggest that Scc2C is insufficient and that the Scc4-Scc2N module is required to mediate stable RSC interaction.

We next addressed whether the Scc4-Scc2N module is sufficient to bind RSC. We again used cells depleted of endogenous Scc2 but this time expressed Scc2N alongside Scc2 and Scc2C. Sth1 efficiently interacted with Scc4 only in the presence of full-length Scc2. The interaction was greatly reduced in the case of both Scc2N and Scc2C (Figure 5D). This suggests that the Scc4-Scc2N and the Scc2C module make joint contributions to the cohesin loader-RSC interaction.

Because neither Scc4-Scc2N nor Scc2C are by themselves sufficient for cohesin loading *in vivo*, we finally expressed both Scc2N and Scc2C in the same cells. However, even this failed to restore cell growth following depletion of endogenous Scc2 (Figure S5E), suggesting that the Scc4-Scc2N globular head and the Scc2C HEAT repeat module must be linked for cohesin loader function.

### Connecting Scc2C with RSC Replaces Scc4

If the main role of Scc4-Scc2N is cohesin loader recruitment to chromatin receptors, then we might be able to replace Scc4-Scc2N with an alternative link between RSC and Scc2C. To test this, we expressed an N-terminal fusion of Scc2C with GFP binding protein (GBP), a single-chain nanobody with high affinity for GFP (Rothbauer et al., 2006; Figure S6A). GBP-Scc2C expression by itself did not rescue cell viability. Strikingly, C-terminal fusion of Sth1 to GFP provided a suitable

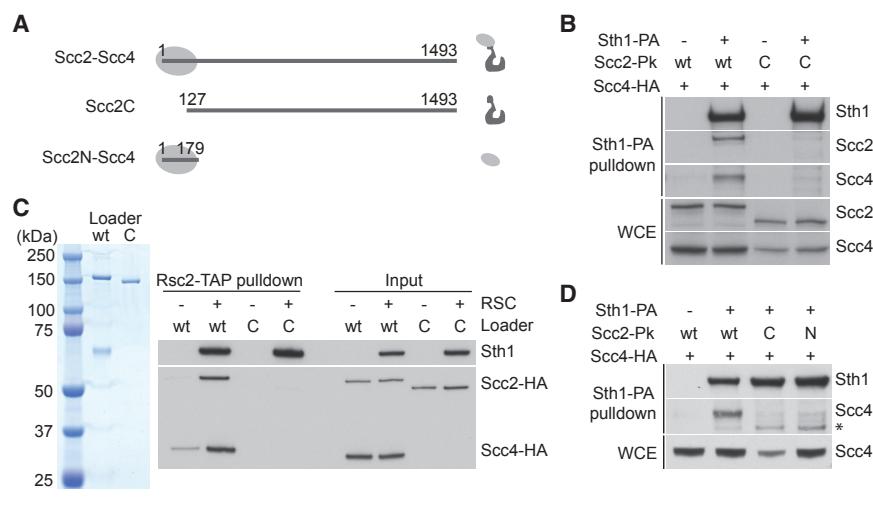

(D) Scc4-Scc2N fails to stably interact with RSC. Cell extracts of the indicated strains were obtained as in (B). Protein A-tagged Sth1 was precipitated, and coprecipitation of Scc4 was analyzed by immunoblotting. \*, asterisk indicates a non-specific band. See also [Figure S5](#) for characterization of cohesin loader module expression, their chromatin binding, and their ability to promote cohesin loading and sister chromatid cohesion.

### Figure 5. Both Scc4 and Scc2C contribute to the RSC Interaction

(A) Schematic of cohesin loader modules used in this experiment.

(B) Scc2C shows reduced interaction with RSC. Cell extracts from wild-type Scc2- or Scc2C-expressing cells were prepared following G1 synchronization, endogenous Scc2 depletion, and release to nocodazole-induced mitotic arrest. Protein A-tagged Sth1 was precipitated, and coprecipitation of Scc2 and Scc4 was analyzed by immunoblotting.

(C) Purified Scc2C fails to interact with RSC. The Coomassie-stained gel shows the purified Scc2-Scc4 complex and Scc2C. Equimolar amounts of RSC and either Scc2-Scc4 or Scc2C were mixed. RSC was precipitated by its tandem affinity purification (TAP)-tagged Rsc2 subunit, and copurification of the cohesin loader was analyzed by immunoblotting.

receptor for GBP-Scc2C to sustain cell proliferation upon Scc2 depletion ([Figures 6A and 6B](#)). As could be expected, Scc4 was no longer required for viability of these cells. Chromosomal cohesin levels are depleted in cells expressing only GBP-Scc2C but were restored by Sth1-GFP to at least half of wild-type levels, both along chromosome arms as well as at centromeres ([Figure 6C](#)). Cohesin loading was now also independent of Scc4 ([Figure S6B](#)). This suggests that the essential role of the Scc4-Scc2N module can be replaced by directing Scc2C to the RSC complex in an alternative way.

### Chromatin Remodelers as Scc2C Receptors

Our ability to reconstitute cohesin loading using GBP-Scc2C allowed us to investigate the requirements at chromosomal cohesin loading sites. In other words, can chromosomal proteins other than RSC serve as functional GBP-Scc2C receptors? To explore this, we fused GFP to the catalytic subunits of the other budding yeast chromatin remodelers (Snf2, Isw1, Isw2, Chd1, Swr1, and Ino80), pioneer transcription factors (Abf1, Reb1, and Rap1), and other regulators that overlap with cohesin loading sites (Fhl1 and Hmo1) ([Lopez-Serra et al., 2014](#)). In addition, we included chromatin factors that are expressed at levels comparable with Sth1 but are found at transcription termination sites instead of promoters (Rat1, Rtt103, and Pcf11) ([Baejen et al., 2017](#); [Ghaemmaghami et al., 2003](#); [Kulak et al., 2014](#)). Among these alternate GBP-Scc2C receptors, the remodeler Isw1-GFP supported robust cell growth and, to a lesser degree, Chd1-GFP ([Figures 6D and S6C](#)). Isw1 and Chd1 are thought to regulate nucleosome spacing during chromatin assembly. Although they are not known to evict nucleosomes, both share with RSC the general mode of mobilizing nucleosomes by DNA translocation ([Clapier et al., 2017](#)).

Two additional GFP fusions allowed minimal cell proliferation in conjunction with GBP-Scc2C, those to Snf2 and to Abf1. Snf2 is the catalytic subunit of the SWI/SNF chromatin

remodeler, closely related to RSC. However, Snf2 is an order of magnitude less abundant than Sth1 ([Ghaemmaghami et al., 2003](#); [Kulak et al., 2014](#)), which could be a reason for the inefficient rescue. Abf1 is a pioneer transcription factor whose binding sites fall into nucleosome-depleted regions that are maintained by RSC ([Kubik et al., 2018](#)). Together, this suggests that, among the places tested, Scc2C becomes functional in proximity to a chromatin remodeler. This is consistent with the idea that nucleosome-free DNA is the required substrate for cohesin loading.

Finally, we targeted GBP-Scc2C to the centromere using Ctf19-GFP as a receptor. This restored cohesin loading at the centromere to around half the levels seen in wild-type cells. Cohesin levels remained low along chromosome arms ([Figure 6E](#)). Despite substantial cohesin loading at centromeres, GBP-Scc2C recruitment to Ctf19-GFP or to Chl4-GFP, another component of the Ctf19 inner kinetochore complex, did not support cell growth. This opens the possibility that RSC-mediated cohesin loading along chromosome arms, as well as at centromeres, is required for survival.

### DISCUSSION

The chromosomal loading sites of the cohesin complex at centromeres and at promoters of actively transcribed genes have been known for some time ([Kagey et al., 2010](#); [Lengronne et al., 2004](#); [Zuin et al., 2014](#)), but the chromatin characteristics underlying these locations were incompletely understood. Previous work pointing to a role for the yeast RSC chromatin remodeler ([Lopez-Serra et al., 2014](#)) left unanswered how RSC promotes cohesin loading. Here we describe a dual but closely linked role of RSC during cohesin loading. First, RSC acts as the chromatin receptor for the Scc2-Scc4 complex, and second, chromatin remodeling makes nucleosome-free DNA accessible for the cohesin loading reaction. These findings have implications for how cohesin accesses DNA in the context of chromatin.

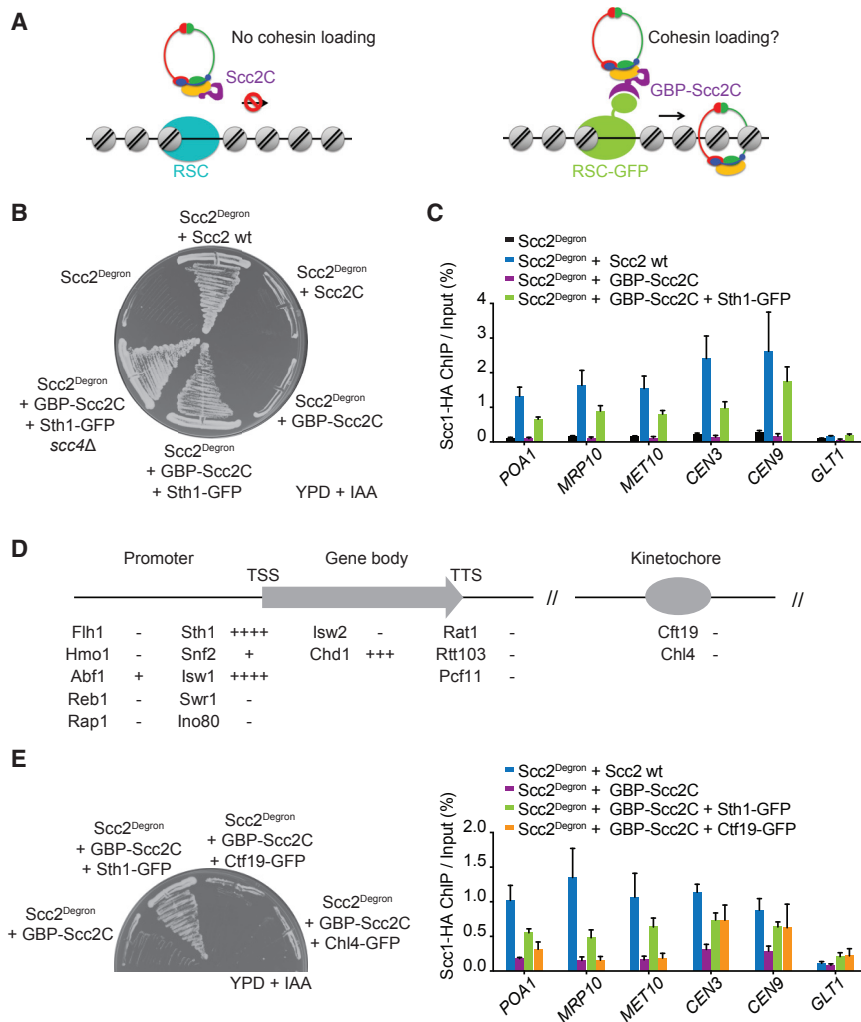

**Figure 6. Engineered Cohesin Loading by Chromatin Remodelers and Scc2C**

(A) Schematic of engineered GBP-Sc2C2 tethering to candidate chromatin receptors.

(B) GBP-Sc2C2 tethering to Sth1-GFP bypasses the need for Scc2 and Scc4. Scc2<sup>Degrone</sup> cells and Scc2<sup>Degrone</sup> cells expressing the indicated components were streaked on rich YPD medium containing methionine to repress Scc2<sup>Degrone</sup> expression and IAA to promote its degradation.

(C) GBP-Sc2C2 tethering to Sth1-GFP reconstitutes cohesin loading. Chromosomal cohesin levels were assessed in cells of the indicated genotypes following G1 synchronization, endogenous Scc2 depletion, and release into a nocodazole-imposed mitotic arrest. Cohesin was detected by ChIP against Scc1, followed by real-time qPCR at three chromosome arm and two centromere cohesin binding sites and a negative control site. Means and SEM of three independent experiments are shown. Scc2<sup>Degrone</sup> + Scc2 wt and Scc2<sup>Degrone</sup> + GBP-Sc2C2 + Sth1-GFP,  $p < 0.01$ ; Scc2<sup>Degrone</sup> + GBP-Sc2C2,  $p$  not significant; two-way ANOVA test compared with the Scc2<sup>Degrone</sup> strain.

(D) Summary of cell growth following endogenous Scc2<sup>Degrone</sup> depletion on YPD + IAA medium and tethering of GBP-Sc2C2 to the indicated chromatin receptors. Growth was ranked from - to ++++ based on Figure S6C.

(E) Tethering GBP-Sc2C2 to the inner kinetochores restores centromeric cohesin loading but not cell viability. Cell growth and cohesin loading in the indicated strains was analyzed as in (B) and (C). Scc2<sup>Degrone</sup> + Scc2 wt and Scc2<sup>Degrone</sup> + GBP-Sc2C2 + Sth1-GFP,  $p < 0.01$ ; Scc2<sup>Degrone</sup> + GBP-Sc2C2 + Ctf19-GFP,  $p$  not significant; two-way ANOVA test compared with the Scc2<sup>Degrone</sup> + GBP-Sc2C2 strain at chromosome arm sites. Scc2<sup>Degrone</sup> + GBP-Sc2C2,  $p < 0.01$ ; Scc2<sup>Degrone</sup> + GBP-Sc2C2 + Sth1-GFP

and Scc2<sup>Degrone</sup> + GBP-Sc2C2 + Ctf19-GFP,  $p$  not significant; two-way ANOVA test compared with the Scc2<sup>Degrone</sup> + Scc2 wt strain at the two centromeric sites.

See also Figure S6 for controls for GBP-Sc2C2 expression, cohesin loading in the absence of Scc4, and cell growth data following GBP-Sc2C2 tethering to the various chromatin receptors.

### RSC as a Chromatin Receptor for the Cohesin Loader

Our characterization of an ATPase-deficient RSC complex revealed its role as an Scc2-Scc4 complex receptor on chromatin that is independent of RSC's role in chromatin remodeling. Direct protein interactions exist between RSC and the cohesin loader, involving both the Scc2 and Scc4 subunits, as well as direct interactions with the cohesin complex. The RSC complex consists of 19 subunits (Clapier et al., 2017), providing opportunities for multiple protein contacts. The details of these interactions and their implications for cohesin loading will be fertile ground for further investigation.

An initial cohesin loader recruitment role for the RSC complex, independent of chromatin remodeling, is consistent with observations that forced nucleosome positioning into a previously open *RPL19B* gene promoter does not impede Scc2-Scc4 recruitment (Lopez-Serra et al., 2014). The determinants of cohesin loading sites thus appear to be those of the RSC complex,

which, in turn, uses a still incompletely understood combinatorial mechanism to find its target sites. This includes specificities for AT-rich sequences, acetylated histone H3 tails, and help from pioneer transcription factors, all of which are found at cohesin loading sites (Kubik et al., 2018). Peak calling in RSC and Scc2-Scc4 chromatin immunoprecipitation experiments requires thresholding that will have limited our knowledge to the most robust binding sites (Kagey et al., 2010; Kubik et al., 2018; Lopez-Serra et al., 2014; Zuin et al., 2014). Cohesin loading might take place at additional promoters and other places in the genome where Scc2-Scc4 and RSC occupancy falls below detection thresholds.

The important role of the Scc4-Scc2N module for cohesin loading onto chromosomes *in vivo*, but not onto naked DNA *in vitro*, could be explained by its role as a RSC adaptor. Although Scc4 is essential for cohesin loading in most instances (Bernard et al., 2006; Ciosk et al., 2000; Watrin et al., 2006), a recent report



suggests that human haploid HAP-1 cells are able to proliferate without *Scs4* (Haarhuis et al., 2017). Interactions that both *Scs2* and cohesin make with the RSC complex, or additional chromatin receptors in human cells, could make up for this loss. Support for this interpretation comes from a recent genetic study in budding yeast. An *Scs2* mutation that increases its affinity for cohesin also makes *Scs4* dispensable (Petela et al., 2018). Given the three-way interactions between cohesin, its loader, and the RSC complex, increased affinity between one pair could compensate for loss of another, thus allowing cohesin loading without *Scs4*. At budding yeast centromeres, cohesin acts as a cofactor for *Scs2-Scs4* recruitment (Fenius et al., 2013), providing further evidence for the interdependence of cohesin and cohesin loader recruitment. Although cohesin loader recruitment to centromeres is augmented by the Ctf19 inner kinetochore complex, cohesin loading remains dependent on RSC, which is enriched at centromeres (Hsu et al., 2003).

### Nucleosome-free DNA as the Substrate for SMC Complex Loading

In addition to being a receptor for the cohesin loader, the RSC ATPase is required to facilitate cohesin loading. This suggests that nucleosome sliding and/or eviction is part of the cohesin loading reaction. In a reconstituted *in vitro* reaction, *Scs2-Scs4* stimulates cohesin loading onto naked DNA but not nucleosomal DNA. Thus, nucleosome-free DNA, provided by the RSC complex, is likely also a required substrate for cohesin loading *in vivo*. Among the chromatin remodelers, the RSC complex within the SWI/SNF family is specialized in facilitating chromatin access (Clapier et al., 2017). However, there is no exclusive relationship between RSC and cohesin loading. *Scs2C* fusion to other SWI/SNF, ISWI, or CHD remodelers, representing three of the four eukaryotic chromatin remodeler families, provide alternative means to load cohesin. We note that RSC depletion greatly reduces, but does not abolish, cohesin loading, consistent with the possibility of promiscuous help from other remodelers. Only *Scs2C* fusion to INO80 family members was unable to support cell viability. This could have been for trivial technical reasons or it could be that the specific function of INO80 remodelers in nucleosome editing limits their ability to support cohesin loading.

Do other SMC complexes require similar nucleosome-free regions for their chromatin association? Condensin loading sites in budding yeast coincide with those of cohesin, even though no direct protein interaction is known between condensin and the cohesin loader (D'Ambrosio et al., 2008). Rather, condensin interacts with TBP and TFIIC transcription factor complexes (Haeusler et al., 2008; Kim et al., 2016). Although the chromatin receptors differ, a common requirement for accessible nucleosome-free DNA in open chromatin might unite the SMC complexes. Condensin also loads at open promoter regions in fission yeast, *C. elegans*, and human cells, whereas the fission yeast RSC complex has been implicated in the loading of both cohesin and condensin onto chromosomes (Kotomura et al., 2018; Kranz et al., 2013; Sutani et al., 2015; Toselli-Mollereau et al., 2016). Given that DNA has to pass through protein-protein interfaces to enter an SMC ring (Murayama and Uhlmann, 2015), it is plausible that nucleosomes pose a steric hindrance.

### Implications for Cohesin Loading in Higher Eukaryotes

Tethering the *Scs2C* cohesin loader module to various chromatin receptors allowed us to probe possible locations for cohesin loading. RSC fusion sustained cell growth and supported cohesin loading along both chromosome arms as well as at centromeres. These findings do not exclude the existence of additional or alternative chromatin receptors. Specialized receptors might serve other cohesin-dependent processes, such as DNA repair. The human NIPBL<sup>*Scs2*</sup> cohesin loader subunit engages with the heterochromatin protein HP1 $\gamma$  to promote cohesin loading at sites of double-stranded DNA breaks (Bot et al., 2017). On transcriptionally inactive chromatin in *Xenopus* oocyte extracts, the pre-replicative complex serves as a cohesin entry point (Takahashi et al., 2008), which, in turn, might be linked to nucleosome-free regions. An additional reported interaction of the cohesin loader with the MCM helicase facilitates cohesin loading during S phase in HeLa cells (Zheng et al., 2018).

Circumstantial evidence links RSC orthologs to cohesin loading in higher eukaryotes. Depletion of BAF180, a subunit of the mammalian PBAF complex, leads to sister chromatid cohesion defects both in mouse embryonic stem cells as well as in human cell lines (Brownlee et al., 2014). Furthermore, mutations in NIPBL are the cause of Cornelia de Lange syndrome, a congenital disorder whose clinical features are thought to be the collective outcome of gene expression changes during development (Krantz et al., 2004). The closely related clinical features of Coffin-Siris syndrome result from mutations in subunits of the human BAF chromatin remodeler (Parenti et al., 2017), suggesting functional overlap between the human cohesin loader and BAF. We note that a human ISWI chromatin remodeling complex has also been implicated in cohesin loading onto chromosomes, as has been the human mediator complex that is found at active promoters (Hakimi et al., 2002; Kagey et al., 2010). Whether a subset or all of these chromatin remodelers and transcription factors are receptors for the human cohesin loader remains to be explored. The role of chromatin remodeling during loading of the human cohesin complex onto chromosomes and its link to human disease is an important area for further investigations.

### STAR★METHODS

Detailed methods are provided in the online version of this paper and include the following:

- KEY RESOURCES TABLE
- CONTACT FOR REAGENT AND RESOURCE SHARING
- EXPERIMENTAL MODEL AND SUBJECT DETAILS
- METHOD DETAILS
  - Yeast Strains and Culture
  - Yeast Molecular Biology Techniques
  - Nucleosome Positioning Analysis
  - Protein Purification
  - Co-precipitation of purified proteins
  - Nucleosome Assembly
  - *In Vitro* Cohesin Loading
- DATA AND SOFTWARE AVAILABILITY



## SUPPLEMENTAL INFORMATION

Supplemental Information can be found online at <https://doi.org/10.1016/j.molcel.2019.02.027>.

## ACKNOWLEDGMENTS

We would like to thank L. Lopez-Serra for the initial observation of RSC-cohesin and RSC-cohesin loader interactions, B. Cairns and K. Shirahige for antibodies, P. Korber for the +1 nucleosome annotation list, Y. Kakui for the microarray analyses, C. Bouchoux for reagents and advice, and J. Diffley from the Chromosome Replication Laboratory, A. Alidoust and N. Patel from the Crick Fermentation Science Technology Platform, as well as members from the Crick High Throughput Sequencing Science Technology Platform for their contributions and our laboratory members for discussions and critical reading of the manuscript. This project received funding from the European Research Council (ERC) under the European Union's Horizon 2020 research and innovation program (grant agreement No. 670412) and The Francis Crick Institute, which receives its core funding from Cancer Research UK (FC001198), the UK Medical Research Council (FC001198), and the Wellcome Trust (FC001198). S.M. and M.M. were supported by EMBO long-term fellowships.

## AUTHOR CONTRIBUTIONS

S.M. and F.U. conceived the study. S.M. performed all experiments. M.M. developed the budding yeast cohesin loading assay and provided reagents. C.S.C.-D. generated the nucleosomal template. H.P. analyzed high-throughput sequencing data. S.M. and F.U. wrote the manuscript with input from all coauthors.

## DECLARATION OF INTERESTS

The authors declare no competing interests.

Received: August 2, 2018

Revised: January 14, 2019

Accepted: February 15, 2019

Published: March 25, 2019

## REFERENCES

- Baejen, C., Andreani, J., Torkler, P., Battaglia, S., Schwalb, B., Lidschreiber, M., Maier, K.C., Boltendahl, A., Rus, P., Esslinger, S., et al. (2017). Genome-wide Analysis of RNA Polymerase II Termination at Protein-Coding Genes. *Mol. Cell* **66**, 38–49.e6.
- Baetz, K.K., Krogan, N.J., Emili, A., Greenblatt, J., and Hieter, P. (2004). The ctf13-30/CTF13 genomic haploinsufficiency modifier screen identifies the yeast chromatin remodeling complex RSC, which is required for the establishment of sister chromatid cohesion. *Mol. Cell. Biol.* **24**, 1232–1244.
- Bernard, P., Drogat, J., Maure, J.F., Dheur, S., Vaur, S., Genier, S., and Javerzat, J.P. (2006). A screen for cohesion mutants uncovers Ssl3, the fission yeast counterpart of the cohesin loading factor Scc4. *Curr. Biol.* **16**, 875–881.
- Bot, C., Pfeiffer, A., Giordano, F., Manjeera, D.E., Dantuma, N.P., and Ström, L. (2017). Independent mechanisms recruit the cohesin loader protein NIPBL to sites of DNA damage. *J. Cell Sci.* **130**, 1134–1146.
- Brownlee, P.M., Chambers, A.L., Cloney, R., Bianchi, A., and Downs, J.A. (2014). BAF180 promotes cohesion and prevents genome instability and aneuploidy. *Cell Rep.* **6**, 973–981.
- Busslinger, G.A., Stocsits, R.R., van der Lelij, P., Axelsson, E., Tedeschi, A., Galjart, N., and Peters, J.M. (2017). Cohesin is positioned in mammalian genomes by transcription, CTCF and Wapl. *Nature* **544**, 503–507.
- Chao, W.C., Murayama, Y., Muñoz, S., Costa, A., Uhlmann, F., and Singleton, M.R. (2015). Structural Studies Reveal the Functional Modularity of the Scc2-Scc4 Cohesin Loader. *Cell Rep.* **12**, 719–725.
- Chen, K., Chen, Z., Wu, D., Zhang, L., Lin, X., Su, J., Rodriguez, B., Xi, Y., Xia, Z., Chen, X., et al. (2015). Broad H3K4me3 is associated with increased transcription elongation and enhancer activity at tumor-suppressor genes. *Nat. Genet.* **47**, 1149–1157.
- Ciosk, R., Shirayama, M., Shevchenko, A., Tanaka, T., Toth, A., Shevchenko, A., and Nasmyth, K. (2000). Cohesin's binding to chromosomes depends on a separate complex consisting of Scc2 and Scc4 proteins. *Mol. Cell* **5**, 243–254.
- Clapier, C.R., Iwasa, J., Cairns, B.R., and Peterson, C.L. (2017). Mechanisms of action and regulation of ATP-dependent chromatin-remodelling complexes. *Nat. Rev. Mol. Cell Biol.* **18**, 407–422.
- D'Ambrosio, C., Schmidt, C.K., Katou, Y., Kelly, G., Itoh, T., Shirahige, K., and Uhlmann, F. (2008). Identification of cis-acting sites for condensin loading onto budding yeast chromosomes. *Genes Dev.* **22**, 2215–2227.
- Davidson, I.F., Goetz, D., Zaczek, M.P., Molodtsov, M.I., Huis In 't Veld, P.J., Weissmann, F., Litos, G., Cisneros, D.A., Ocampo-Hafalla, M., Ladurner, R., et al. (2016). Rapid movement and transcriptional re-localization of human cohesin on DNA. *EMBO J.* **35**, 2671–2685.
- Dorsett, D., and Ström, L. (2012). The ancient and evolving roles of cohesin in gene expression and DNA repair. *Curr. Biol.* **22**, R240–R250.
- Du, J., Nasir, I., Benton, B.K., Klädde, M.P., and Laurent, B.C. (1998). Sth1p, a *Saccharomyces cerevisiae* Snf2p/Swi2p homolog, is an essential ATPase in RSC and differs from Snf/Swi in its interactions with histones and chromatin-associated proteins. *Genetics* **150**, 987–1005.
- Fernius, J., Nerusheva, O.O., Galander, S., Alves, F.de.L., Rappsilber, J., and Marston, A.L. (2013). Cohesin-dependent association of scc2/4 with the centromere initiates pericentromeric cohesion establishment. *Curr. Biol.* **23**, 599–606.
- Ghaemmaghami, S., Huh, W.K., Bower, K., Howson, R.W., Belle, A., Dephoure, N., O'Shea, E.K., and Weissman, J.S. (2003). Global analysis of protein expression in yeast. *Nature* **425**, 737–741.
- Haarhuis, J.H.I., van der Weide, R.H., Blomen, V.A., Yanez-Cuna, J.O., Amendola, M., van Ruiten, M.S., Krijger, P.H.L., Teunissen, H., Medema, R.H., van Steensel, B., et al. (2017). The Cohesin Release Factor WAPL Restricts Chromatin Loop Extension. *Cell* **169**, 693–707.e14.
- Haeusler, R.A., Pratt-Hyatt, M., Good, P.D., Gipson, T.A., and Engelke, D.R. (2008). Clustering of yeast tRNA genes is mediated by specific association of condensin with tRNA gene transcription complexes. *Genes Dev.* **22**, 2204–2214.
- Hakimi, M.A., Bochar, D.A., Schmiesing, J.A., Dong, Y., Barak, O.G., Speicher, D.W., Yokomori, K., and Shiekhattar, R. (2002). A chromatin remodelling complex that loads cohesin onto human chromosomes. *Nature* **418**, 994–998.
- Hartley, P.D., and Madhani, H.D. (2009). Mechanisms that specify promoter nucleosome location and identity. *Cell* **137**, 445–458.
- Hinshaw, S.M., Makrantoni, V., Kerr, A., Marston, A.L., and Harrison, S.C. (2015). Structural evidence for Scc4-dependent localization of cohesin loading. *eLife* **4**, e06057.
- Hinshaw, S.M., Makrantoni, V., Harrison, S.C., and Marston, A.L. (2017). The Kinetochores Receptor for the Cohesin Loading Complex. *Cell* **171**, 72–84.e13.
- Hornig, N.C., and Uhlmann, F. (2004). Preferential cleavage of chromatin-bound cohesin after targeted phosphorylation by Polo-like kinase. *EMBO J.* **23**, 3144–3153.
- Hsu, J.M., Huang, J., Meluh, P.B., and Laurent, B.C. (2003). The yeast RSC chromatin-remodeling complex is required for kinetochore function in chromosome segregation. *Mol. Cell. Biol.* **23**, 3202–3215.
- Huang, J., Hsu, J.M., and Laurent, B.C. (2004). The RSC nucleosome-remodeling complex is required for Cohesin's association with chromosome arms. *Mol. Cell* **13**, 739–750.
- Kagey, M.H., Newman, J.J., Bilodeau, S., Zhan, Y., Orlando, D.A., van Berkum, N.L., Ebmeier, C.C., Goossens, J., Rahl, P.B., Levine, S.S., et al. (2010). Mediator and cohesin connect gene expression and chromatin architecture. *Nature* **467**, 430–435.

- Katou, Y., Kaneshiro, K., Aburatani, H., and Shirahige, K. (2006). Genomic approach for the understanding of dynamic aspect of chromosome behavior. *Methods Enzymol.* *409*, 389–410.
- Kikuchi, S., Borek, D.M., Otwinowski, Z., Tomchick, D.R., and Yu, H. (2016). Crystal structure of the cohesin loader Scc2 and insight into cohesinopathy. *Proc. Natl. Acad. Sci. USA* *113*, 12444–12449.
- Kim, K.D., Tanizawa, H., Iwasaki, O., and Noma, K. (2016). Transcription factors mediate condensin recruitment and global chromosomal organization in fission yeast. *Nat. Genet.* *48*, 1242–1252.
- Kotomura, N., Tsunemine, S., Kuragano, M., Asanuma, T., Nakagawa, H., Tanaka, K., and Murakami, Y. (2018). Sfh1, an essential component of the RSC chromatin remodeling complex, maintains genome integrity in fission yeast. *Genes Cells* *23*, 738–752.
- Krantz, I.D., McCallum, J., DeScipio, C., Kaur, M., Gillis, L.A., Yaeger, D., Jukofsky, L., Wasserman, N., Bottani, A., Morris, C.A., et al. (2004). Cornelia de Lange syndrome is caused by mutations in NIPBL, the human homolog of *Drosophila melanogaster* Nipped-B. *Nat. Genet.* *36*, 631–635.
- Kranz, A.L., Jiao, C.Y., Winterkorn, L.H., Albritton, S.E., Kramer, M., and Ercan, S. (2013). Genome-wide analysis of condensin binding in *Caenorhabditis elegans*. *Genome Biol.* *14*, R112.
- Kubik, S., O'Duibhir, E., de Jonge, W.J., Mattarocci, S., Albert, B., Falcone, J.L., Bruzzone, M.J., Holstege, F.C.P., and Shore, D. (2018). Sequence-Directed Action of RSC Remodeler and General Regulatory Factors Modulates +1 Nucleosome Position to Facilitate Transcription. *Mol. Cell* *71*, 89–102.e5.
- Kulak, N.A., Pichler, G., Paron, I., Nagaraj, N., and Mann, M. (2014). Minimal, encapsulated proteomic-sample processing applied to copy-number estimation in eukaryotic cells. *Nat. Methods* *11*, 319–324.
- Kurat, C.F., Yeeles, J.T.P., Patel, H., Early, A., and Diffley, J.F.X. (2017). Chromatin Controls DNA Replication Origin Selection, Lagging-Strand Synthesis, and Replication Fork Rates. *Mol. Cell* *65*, 117–130.
- Lantermann, A., Strålfors, A., Fagerström-Billai, F., Korber, P., and Ekwall, K. (2009). Genome-wide mapping of nucleosome positions in *Schizosaccharomyces pombe*. *Methods* *48*, 218–225.
- Lengronne, A., Katou, Y., Mori, S., Yokobayashi, S., Kelly, G.P., Itoh, T., Watanabe, Y., Shirahige, K., and Uhlmann, F. (2004). Cohesin relocation from sites of chromosomal loading to places of convergent transcription. *Nature* *430*, 573–578.
- Li, H., and Durbin, R. (2009). Fast and accurate short read alignment with Burrows-Wheeler transform. *Bioinformatics* *25*, 1754–1760.
- Lopez-Serra, L., Kelly, G., Patel, H., Stewart, A., and Uhlmann, F. (2014). The Scc2-Scc4 complex acts in sister chromatid cohesion and transcriptional regulation by maintaining nucleosome-free regions. *Nat. Genet.* *46*, 1147–1151.
- Lorch, Y., and Kornberg, R.D. (2017). Chromatin-remodeling for transcription. *Q. Rev. Biophys.* *50*, e5.
- Martin, M. (2011). Cutadapt Removes Adapter Sequences From High-Throughput Sequencing Reads. *EMBnet.journal* *17*, 10–12.
- Minamino, M., Higashi, T.L., Bouchoux, C., and Uhlmann, F. (2018). Topological in vitro loading of the budding yeast cohesin ring onto DNA. *Life Sci. Alliance*. Published online October 26, 2018. <https://doi.org/10.26508/lsa.201800143>.
- Murayama, Y., and Uhlmann, F. (2014). Biochemical reconstitution of topological DNA binding by the cohesin ring. *Nature* *505*, 367–371.
- Murayama, Y., and Uhlmann, F. (2015). DNA Entry into and Exit out of the Cohesin Ring by an Interlocking Gate Mechanism. *Cell* *163*, 1628–1640.
- Nasmyth, K., and Haering, C.H. (2009). Cohesin: its roles and mechanisms. *Annu. Rev. Genet.* *43*, 525–558.
- Ng, H.H., Robert, F., Young, R.A., and Struhl, K. (2002). Genome-wide location and regulated recruitment of the RSC nucleosome-remodeling complex. *Genes Dev.* *16*, 806–819.
- Nishimura, K., Fukagawa, T., Takisawa, H., Kakimoto, T., and Kanemaki, M. (2009). An auxin-based degron system for the rapid depletion of proteins in nonplant cells. *Nat. Methods* *6*, 917–922.
- Ocampo-Hafalla, M., Muñoz, S., Samora, C.P., and Uhlmann, F. (2016). Evidence for cohesin sliding along budding yeast chromosomes. *Open Biol.* *6*, 150178.
- Parenti, I., Teresa-Rodrigo, M.E., Pozojevic, J., Ruiz Gil, S., Bader, I., Braunholz, D., Bramswig, N.C., Gervasini, C., Larizza, L., Pfeiffer, L., et al. (2017). Mutations in chromatin regulators functionally link Cornelia de Lange syndrome and clinically overlapping phenotypes. *Hum. Genet.* *136*, 307–320.
- Petela, N.J., Gligoris, T.G., Metson, J., Lee, B.G., Voulgaris, M., Hu, B., Kikuchi, S., Chapard, C., Chen, W., Rajendra, E., et al. (2018). Scc2 Is a Potent Activator of Cohesin's ATPase that Promotes Loading by Binding Scc1 without Pds5. *Mol. Cell* *70*, 1134–1148.e7.
- Peters, J.M., and Nishiyama, T. (2012). Sister chromatid cohesion. *Cold Spring Harb. Perspect. Biol.* *4*, a011130.
- Rothbauer, U., Zolghadr, K., Tillib, S., Nowak, D., Schermelleh, L., Gahl, A., Backmann, N., Conrath, K., Muyldermans, S., Cardoso, M.C., and Leonhardt, H. (2006). Targeting and tracing antigens in live cells with fluorescent nanobodies. *Nat. Methods* *3*, 887–889.
- Sutani, T., Sakata, T., Nakato, R., Masuda, K., Ishibashi, M., Yamashita, D., Suzuki, Y., Hirano, T., Bando, M., and Shirahige, K. (2015). Condensin targets and reduces unwound DNA structures associated with transcription in mitotic chromosome condensation. *Nat. Commun.* *6*, 7815.
- Takahashi, T.S., Basu, A., Bermudez, V., Hurwitz, J., and Walter, J.C. (2008). Cdc7-Drf1 kinase links chromosome cohesion to the initiation of DNA replication in *Xenopus* egg extracts. *Genes Dev.* *22*, 1894–1905.
- Toselli-Mollereau, E., Robellet, X., Fauque, L., Lemaire, S., Schiklenk, C., Klein, C., Hocquet, C., Legros, P., N'Guyen, L., Mouillard, L., et al. (2016). Nucleosome eviction in mitosis assists condensin loading and chromosome condensation. *EMBO J.* *35*, 1565–1581.
- Uhlmann, F. (2016). SMC complexes: from DNA to chromosomes. *Nat. Rev. Mol. Cell Biol.* *17*, 399–412.
- van Ruiten, M.S., and Rowland, B.D. (2018). SMC Complexes: Universal DNA Looping Machines with Distinct Regulators. *Trends Genet.* *34*, 477–487.
- Watrin, E., Schleiffer, A., Tanaka, K., Eisenhaber, F., Nasmyth, K., and Peters, J.M. (2006). Human Scc4 is required for cohesin binding to chromatin, sister-chromatid cohesion, and mitotic progression. *Curr. Biol.* *16*, 863–874.
- Wittmeyer, J., Saha, A., and Cairns, B. (2004). DNA translocation and nucleosome remodeling assays by the RSC chromatin remodeling complex. *Methods Enzymol.* *377*, 322–343.
- Zhang, Z., Wippo, C.J., Wal, M., Ward, E., Korber, P., and Pugh, B.F. (2011). A packing mechanism for nucleosome organization reconstituted across a eukaryotic genome. *Science* *332*, 977–980.
- Zheng, G., Kanchwala, M., Xing, C., and Yu, H. (2018). MCM2-7-dependent cohesin loading during S phase promotes sister-chromatid cohesion. *eLife* *7*, e33920.
- Zuin, J., Franke, V., van Ijcken, W.F., van der Sloot, A., Krantz, I.D., van der Reijden, M.I., Nakato, R., Lenhard, B., and Wendt, K.S. (2014). A cohesin-independent role for NIPBL at promoters provides insights in CdLS. *PLoS Genet.* *10*, e1004153.

## STAR★METHODS

## KEY RESOURCES TABLE

| REAGENT or RESOURCE                                     | SOURCE                                                                     | IDENTIFIER          |
|---------------------------------------------------------|----------------------------------------------------------------------------|---------------------|
| <b>Antibodies</b>                                       |                                                                            |                     |
| Rabbit polyclonal anti-Sth1                             | Gift from Cairns Lab                                                       | N/A                 |
| Mouse monoclonal anti-Scc1 (362 D11B10) (budding yeast) | Gift from Shirahige Lab                                                    | N/A                 |
| Mouse monoclonal anti- $\alpha$ -tubulin (TAT-1)        | Cell Services Science Technology Platform, The Francis Crick Institute     | N/A                 |
| Mouse monoclonal anti-V5                                | Bio-Rad                                                                    | Cat# MCA1360        |
| Mouse monoclonal anti-HA (F7)                           | Santa Cruz                                                                 | Cat# sc-7392        |
| Mouse monoclonal anti-HA (12CA5)                        | Cell Services, The Francis Crick Institute                                 | N/A                 |
| Rabbit Peroxidase Anti-Peroxidase                       | Sigma-Aldrich                                                              | Cat# P1291          |
| Anti-mouse IgG (HRP-conjugated)                         | GE Healthcare                                                              | Cat# NA931          |
| Anti-rabbit IgG (HRP-conjugated)                        | GE Healthcare                                                              | Cat# NA934          |
| Anti-AID Tag (IAA17) Protein                            | 2B Scientific                                                              | Cat# CAC-APC004AM   |
| <b>Chemicals, Peptides, and Recombinant Proteins</b>    |                                                                            |                     |
| $\alpha$ -factor                                        | Peptide Chemistry Science Technology Platform, The Francis Crick institute | N/A                 |
| Nocodazole                                              | Sigma-Aldrich                                                              | Cat# M1404          |
| Indole-3-acetic acid (IAA)                              | Sigma-Aldrich                                                              | Cat# I3750          |
| G418                                                    | Sigma-Aldrich                                                              | Cat# G8618          |
| Hygromycin B                                            | Invitrogen                                                                 | Cat# 10687010       |
| Formaldehyde solution                                   | Sigma-Aldrich                                                              | Cat# 252549         |
| Phenylmethylsulfonyl fluoride (PMSF)                    | Sigma-Aldrich                                                              | Cat# P7626          |
| Pefabloc SC                                             | Roche                                                                      | Cat# 11 429 876 001 |
| cOmplete EDTA-Free Protease Inhibitor Cocktail          | Sigma-Aldrich                                                              | Cat# 04693132001    |
| Zymolase 100T                                           | MP                                                                         | Cat# 320931         |
| Micrococcal Nuclease                                    | ThermoFisher                                                               | Cat# EN0181         |
| Proteinase K                                            | ThermoFisher                                                               | Cat# EO0491         |
| Benzonase Nuclease                                      | Sigma-Aldrich                                                              | Cat# E1014          |
| RNase A                                                 | Sigma-Aldrich                                                              | Cat# 10109169001    |
| Protein Assay Dye                                       | Bio-Rad                                                                    | Cat# 5000006        |
| Propidium iodide solution                               | Sigma-Aldrich                                                              | Cat# P4864          |
| InstantBlue Coomassie Protein Stain                     | Expedeon                                                                   | Cat# HG773010       |
| GelRed Nucleic Acid Gel Stain                           | Biotium                                                                    | Cat# 41003-1        |
| PowerUp SYBR Green Master Mix                           | ThermoFisher                                                               | Cat# A25742         |
| AcTEV Protease                                          | ThermoFisher                                                               | Cat# 12575015       |
| PreScission Protease                                    | GE Healthcare                                                              | Cat# 27084301       |
| ATP                                                     | Sigma-Aldrich                                                              | Cat# A2383          |
| Phosphocreatine di(tris) salt                           | Sigma-Aldrich                                                              | Cat# P1937          |
| Creatine Kinase                                         | Sigma-Aldrich                                                              | Cat# 10127566001    |
| PstI                                                    | New England Biolabs                                                        | Cat# R0140S         |
| Isopropyl $\beta$ -D-1-thiogalactopyranoside (IPTG)     | Sigma-Aldrich                                                              | Cat# 10724815001    |
| Flag peptide                                            | Peptide Chemistry Science Technology Platform, The Francis Crick institute | N/A                 |
| Budding yeast cohesin (Smc1-Smc3-Scc1-Scc3)             | <a href="#">Minamino et al., 2018</a>                                      | N/A                 |
| Budding yeast Scc2-Scc4                                 | <a href="#">Minamino et al., 2018</a>                                      | N/A                 |

(Continued on next page)

| <b>Continued</b>                                                                                      |                                        |                                                                                           |
|-------------------------------------------------------------------------------------------------------|----------------------------------------|-------------------------------------------------------------------------------------------|
| REAGENT or RESOURCE                                                                                   | SOURCE                                 | IDENTIFIER                                                                                |
| Budding yeast Scc2C                                                                                   | <a href="#">Minamino et al., 2018</a>  | N/A                                                                                       |
| Budding yeast Histones                                                                                | <a href="#">Kurat et al., 2017</a>     | N/A                                                                                       |
| Budding yeast Nap1                                                                                    | <a href="#">Kurat et al., 2017</a>     | N/A                                                                                       |
| Budding yeast ISW1A                                                                                   | <a href="#">Kurat et al., 2017</a>     | N/A                                                                                       |
| Budding yeast RSC                                                                                     | <a href="#">Wittmeyer et al., 2004</a> | N/A                                                                                       |
| <b>Critical Commercial Assays</b>                                                                     |                                        |                                                                                           |
| InFusion HD cloning kit                                                                               | Clontech Laboratories                  | Cat# 639634                                                                               |
| CloneAmp HiFi PCR Premix                                                                              | Clontech Laboratories                  | Cat# 639298                                                                               |
| Q5 Site-Directed Mutagenesis Kit                                                                      | New England Biolabs                    | Cat# E05545                                                                               |
| Dynabeads Protein A                                                                                   | ThermoFisher                           | Cat# 10002D                                                                               |
| Dynabeads M-270 Epoxy                                                                                 | ThermoFisher                           | Cat# 14302D                                                                               |
| Rabbit immunoglobulin G (IgG)                                                                         | Sigma-Aldrich                          | Cat# I5006                                                                                |
| ECL Prime Western Blotting Detection Reagent                                                          | GE Healthcare                          | Cat# RPN2232                                                                              |
| Human IgG-Agarose                                                                                     | Sigma-Aldrich                          | Cat# A6284-5ML                                                                            |
| Calmodulin Affinity Resin                                                                             | Agilent Technologies                   | Cat# 214303                                                                               |
| HiTrap Heparin HP 1 ml                                                                                | GE Healthcare                          | Cat# 17040601                                                                             |
| Superdex 200 Increase 10/300 GL                                                                       | GE Healthcare                          | Cat# 28990944                                                                             |
| Superose 6, 10/300 GL                                                                                 | GE Healthcare                          | Cat# 17517201                                                                             |
| HiTrap Heparin HP 5 ml                                                                                | GE Healthcare                          | Cat# 17040701                                                                             |
| HiLoad 16/600 Superdex 200                                                                            | GE Healthcare                          | Cat# 28-9893-35                                                                           |
| Glutathione Sepharose 4B                                                                              | GE Healthcare                          | Cat# 17075601                                                                             |
| Mono Q 5/50 GL, 1 ml                                                                                  | GE Healthcare                          | Cat# 17516601                                                                             |
| ANTI-FLAG M2 Affinity Gel                                                                             | Sigma-Aldrich                          | Cat# A2220                                                                                |
| Slide-A-Lyzer Dialysis Cassettes, 3.5K MWCO, 12 mL                                                    | ThermoFisher                           | Cat# 66110                                                                                |
| MicroSpin S-400 HR columns                                                                            | GE Healthcare                          | Cat# 27514001                                                                             |
| Amicon Ultra-4 centrifuge filter unit, 10 NMWL                                                        | MERCK MILLIPORE                        | Cat# UFC801024                                                                            |
| Vivaspin 20 centrifugal concentrator, 100,000 MWCO                                                    | Sartorius                              | Cat# VS2042                                                                               |
| <b>Experimental Models: Organisms/Strains</b>                                                         |                                        |                                                                                           |
| All <i>Saccharomyces cerevisiae</i> strains used in this study are listed in <a href="#">Table S1</a> | Lab stock and this study               | N/A                                                                                       |
| <i>Escherichia coli</i> DH5 $\alpha$ competent cells                                                  | New England Biolabs                    | Cat# C2987U                                                                               |
| <b>Oligonucleotides</b>                                                                               |                                        |                                                                                           |
| All oligonucleotides used for qPCR are listed in <a href="#">Table S2</a> .                           | N/A                                    | N/A                                                                                       |
| <b>Recombinant DNA</b>                                                                                |                                        |                                                                                           |
| All plasmid DNA used in this study are listed in <a href="#">Table S3</a> .                           | N/A                                    | N/A                                                                                       |
| <b>Software and Algorithms</b>                                                                        |                                        |                                                                                           |
| Snapgene v2.6                                                                                         | GSL Biotech                            | N/A                                                                                       |
| FlowJo v10.1                                                                                          | FlowJo                                 | N/A                                                                                       |
| ImageQuant TL v8.1                                                                                    | GE Healthcare                          | N/A                                                                                       |
| ImageJ v1.50c                                                                                         | NIH, USA                               | N/A                                                                                       |
| <b>Deposited Data</b>                                                                                 |                                        |                                                                                           |
| MNase sequencing data                                                                                 | This study                             | GEO: GSE117881                                                                            |
| Unprocessed gel images presented in this manuscript                                                   | This study                             | <a href="https://doi.org/10.17632/34fry4t69p.1">https://doi.org/10.17632/34fry4t69p.1</a> |

## CONTACT FOR REAGENT AND RESOURCE SHARING

Further information and requests for resources and reagents should be directed to and will be fulfilled by the Lead Contact, Frank Uhlmann ([frank.uhlmann@crick.ac.uk](mailto:frank.uhlmann@crick.ac.uk)).

## EXPERIMENTAL MODEL AND SUBJECT DETAILS

All *Saccharomyces cerevisiae* yeast strains used in this study were of the W303 background and are listed in [Table S1](#). Cells were cultured at 25°C.  $\alpha$ -factor was used at a concentration of 7.5  $\mu$ g/ml, nocodazole at 6  $\mu$ g/ml and indole-3-acetic acid (IAA) acid at 88  $\mu$ g/ml.

## METHOD DETAILS

### Yeast Strains and Culture

Epitope tagging of endogenous genes and gene deletions were performed by gene targeting using polymerase chain reaction (PCR) products. Cells were grown in rich YP medium or in complete synthetic medium (CSM) lacking methionine, supplemented with 2% glucose. To deplete Sth1 or Scc2, their gene promoters were replaced with the methionine-repressible *MET3* promoter and their C terminus fused to an auxin-inducible degron ([Nishimura et al., 2009](#)). Cells were grown in medium lacking methionine, arrested 1.5 hour with  $\alpha$ -factor, and shifted to YP medium containing methionine and indole-3-acetic acid (IAA) in addition to  $\alpha$ -factor for 2 hours, before release from  $\alpha$ -factor block into synchronous cell cycle progression until reaching a nocodazole-imposed mitotic arrest. Samples for analysis were taken 120 minutes after  $\alpha$ -factor release. Expression of wild-type Sth1 or Sth1<sup>K501R</sup> was accomplished by cloning the *STH1* gene under control of its own promoter into the yeast-*E. coli* shuttle vector YIplac204 including a Pk, HA or Protein A epitope tag. The Sth1<sup>K501R</sup> mutation was introduced by site directed mutagenesis using the Q5 Site-Directed Mutagenesis Kit (New England Biolabs). The resulting plasmids were integrated into the budding yeast genome at the *TRP1* locus. Expression of wild-type Scc2, Scc2C or Scc2N was achieved by cloning the *SCC2* gene under control of its own promoter into the yeast-*E. coli* shuttle vector pRS303, including a Pk epitope tag for detection at the C terminus. Scc2C or Scc2N fragments were derived by deleting part of the Scc2 sequence by site directed mutagenesis. The resulting plasmids were integrated into the budding yeast genome at the *HIS3* locus.

### Yeast Molecular Biology Techniques

#### Immunoblotting

Protein extracts for immunoblotting were prepared following cell fixation using trichloroacetic acid and separated by SDS-polyacrylamide gel electrophoresis before transfer to nitrocellulose membranes. Antibodies used for detection are listed in the Key Resources Table and were visualized using ECL reagents and film (GE Healthcare).

#### FACS analysis of DNA content

Cells were fixed in cold 70% ethanol overnight, then treated with 0.1 mg/ml RNase A in RNase buffer (50 mM Tris-HCl pH 7.5) at 37°C for 2 hours. DNA was stained with 50  $\mu$ g/ml propidium iodide in FACS buffer (200 mM Tris-HCl pH 7.5, 211 mM NaCl, 78 mM MgCl<sub>2</sub>). Samples were sonicated and diluted in 50 mM Tris-HCl pH 7.5. 10,000 cells per sample were analyzed using a FACSCalibur cell analyzer (BD Biosciences) and the data files were curated using FlowJo.

#### Protein interaction analysis

Cell extracts were prepared in EBX buffer (50 mM HEPES-KOH pH 7.5, 100 mM KCl, 2.5 mM MgCl<sub>2</sub>, 10% glycerol, 0.25% Triton X-100, 1 mM DTT, protease inhibitors and benzonase) using glass beads breakage in a cooled Multi-Beads Shocker (Yasui Kikai). Extracts were cleared by centrifugation, precleared and incubated with either IgG coated Dynabeads (ThermoFisher) for Protein A pulldown or with Protein A Dynabeads previously ligated to the respective epitope-specific antibody. Beads were extensively washed and elution was carried out in SDS-PAGE loading buffer.

#### Quantitative ChIP

Chromatin immunoprecipitation was performed as previously described ([Katou et al., 2006](#)). Briefly, cells were fixed with formaldehyde and harvested. Protein extracts were prepared and disrupted by sonication. DNA fragments cross-linked to the tagged protein of interest were enriched by immunoprecipitation. After reversal of the cross-links, DNA both from immunoprecipitates and from whole cell extract was purified and quantified using the PowerUP SYBR Green Master Mix (ThermoFisher) and a Quant Studio 12K Real-Time PCR System (Thermo Fisher). All primer sequences used are listed in [Table S2](#).

#### Sister chromatid cohesion assay

Cells carrying a GFP-marked *URA3* locus were synchronized in G1 using  $\alpha$ -factor and released into a nocodazole-imposed mitotic arrest. Cells were fixed with ice-cold 100% ethanol and imaged using a DeltaVision wide-field fluorescence microscope (GE Healthcare). z stacks with 15 images at 0.1  $\mu$ m intervals were acquired and merged by maximum intensity projection. Quantification of the percentage of cells showing two separated GFP foci was performed using ImageJ.

#### Nucleosome Positioning Analysis

Mononucleosomal DNA isolation was performed as described ([Lantermann et al., 2009](#)). Cells were fixed with formaldehyde, cell walls digested with Zymolase 100T and unprotected DNA was digested with 30 U MNase for 20 minutes at 37°C. DNA was purified, size separated by agarose gel electrophoresis and the band corresponding to mononucleosomal DNA was excised and processed



for sequencing. 100 bp paired end sequencing of MNase-resistant DNA was performed on either the Illumina HiSeq 2500 or 4000 platforms to generate ~100 million reads. Raw reads from each sample were adaptor-trimmed using cutadapt (version 1.9.1) (Martin, 2011) with parameters -a: AGATCGGAAGAGC, -A: AGATCGGAAGAGC, minimum-length = 25, quality-cutoff = 20. BWA (version 0.5.9-r16) (Li and Durbin, 2009) with default parameters was used to perform genome-wide mapping of the adaptor-trimmed reads to the yeast *sacCer3* genome. Alignments were filtered to remove read pairs that were discordant, mapped to different chromosomes, ambiguously mapped, had an insert size outside the range 120–200 bp, or more than 4 mismatches in any read. Sample-level smoothed coverage tracks for nucleosome profile plots were generated with the DANPOS2 *dpos* command (version 2.2.2) (Chen et al., 2015) with parameters paired: 1, span: 1, smooth width: 20, width: 40, count: 10,000,000. The MNase, histone H4-ChIP data of *in vivo* formaldehyde-crosslinked cells (Zhang et al., 2011) were used as the reference dataset for +1 nucleosome dyad locations.

### Protein Purification

Histones, Nap1 and ISW1A were expressed and purified as described in (Kurat et al., 2017). Histones were expressed in bacteria after Isopropyl  $\beta$ -D-1-thiogalactopyranoside (IPTG) induction, the cells were broken by sonication and the extract clarified by ultracentrifugation. Histone octamers were then purified by sequential column chromatography, 5 mL HiTrap Heparin and Superdex 200 Increase 16/600 GL (GE Healthcare). GST-tagged Nap1 was expressed in bacteria by IPTG induction, cells were broken by sonication and the extract clarified by ultracentrifugation. The protein was bound to glutathione agarose beads, Nap1 was released from beads by digestion with PreScission Protease (GE Healthcare), dialyzed and purified on a 1 mL HiTrap Q column (GE Healthcare). ISW1A was purified from yeast cells expressing an endogenously Flag epitope-tagged *loc3* subunit. Cells were grown in YPD to stationary phase and disrupted in a cryogenic grinder under liquid nitrogen. *loc3*-Flag was bound to anti-Flag M2 affinity gel (Sigma-Aldrich), eluted with Flag peptide and further purified using a HiTrap Q column.

Cohesin and the cohesin loader were purified following overexpression under control of galactose-inducible promoters in budding yeast as described in detail elsewhere (Minamino et al., 2018). Briefly, cells were grown in YP medium containing 2% raffinose and protein expression was induced by addition of 2% galactose. Cells were disrupted in a cryogenic grinder under liquid nitrogen, the frozen cell powder was thawed and the lysate was clarified by ultracentrifugation. The lysis buffer contained 5 U/ml Benzonase (Sigma) and 1  $\mu$ g/ml RNase A (Sigma). The complexes were purified by sequential column chromatography, protein A affinity adsorption on IgG-agarose (Sigma) followed by PreScission Protease elution, HiTrap Heparin HP and Superose 6 Increase 10/300 GL (cohesin) or Superdex 200 Increase 10/300 GL (cohesin loader; GE Healthcare).

RSC was purified from budding yeast cells expressing an endogenously TAP-tagged Rsc2 subunit, as described (Wittmeyer et al., 2004). Cells were grown in YPD to stationary phase and disrupted in a cryogenic grinder under liquid nitrogen. The frozen cell powder was thawed and the lysate was clarified by ultracentrifugation. The lysis buffer was supplemented with 5 U/ml Benzonase and 1  $\mu$ g/ml RNase A. The complex was purified by binding to IgG-agarose, followed by TEV protease elution, then bound to calmodulin beads in the presence of calcium, eluted in the presence of EGTA and dialyzed.

### Co-precipitation of purified proteins

50 nM Scc2-Scc4, 50 nM cohesin and 50 nM RSC were mixed in 50  $\mu$ L of IP buffer (25 mM Tris-HCl pH 7.5, 0.5 mM TCEP, 100 mM NaCl, 2.5 mM MgCl<sub>2</sub>, 0.2% Triton X-100, 5% glycerol and 125 U/ml Benzonase) and incubated at 25°C for 15 minutes. After placing on ice for 15 minutes, the binding mixtures were transferred to either antibody-coated, protein A-conjugated magnetic beads for cohesin loader and cohesin precipitation or calmodulin beads in the presence of calcium for RSC precipitation, and rocked 2 hours at 4°C. The beads were washed three times with IP buffer and once with IP buffer containing 300 mM NaCl. The bound proteins were eluted either in SDS-polyacrylamide gel electrophoresis (SDS-PAGE) loading buffer, or in the presence of EGTA in the case of RSC.

### Nucleosome Assembly

Yeast histones (6.86  $\mu$ g), Nap1 (14.61  $\mu$ g) and ISW1A (384 ng) were mixed in a 40  $\mu$ L reaction volume in buffer containing 10 mM HEPES-KOH pH 7.5, 50 mM KCl, 5 mM MgCl<sub>2</sub>, 0.5 mM EDTA, 10% glycerol and 0.1 mg/ml BSA and incubated for 30 minutes on ice. Then, 45 mM creatine phosphate, 3 mM ATP, 6  $\mu$ g creatine phosphate kinase and 1  $\mu$ g plasmid DNA were added and incubated at 30°C for 5 hours. Following chromatin assembly, the buffer was exchanged to 10 mM HEPES-KOH pH 7.5, 50 mM KCl and 10% glycerol using an illustra MicroSpin S-400 HR Column (GE Healthcare).

### In Vitro Cohesin Loading

The *in vitro* cohesin loading assay was performed as described in (Minamino et al., 2018), with adaptations for use with a chromatin template. 15 nM cohesin tetramers and 30 nM cohesin loader were mixed with 30 ng of either free or chromatinized plasmid DNA in a 15  $\mu$ L reaction in buffer containing 35 mM Tris-HCl pH 7.0, 35 mM KCl, 20 mM NaCl, 0.05 mM MgCl<sub>2</sub>, 0.003% Tween, 1 mM tris[2-carboxyethyl]phosphine (TCEP) and 10% glycerol. Reactions were initiated by addition of 2.5 mM ATP and incubated for 1 hour at 29°C. Cohesin-DNA complexes were recovered by cohesin immunoprecipitation, beads were washed with high salt buffer (35 mM Tris pH 7.5, 750 mM NaCl, 10 mM EDTA, 5% Glycerol, 0.35% Triton X-100), DNA was released from beads by proteinase K digestion

and was analyzed by agarose-gel electrophoresis. Gels were stained with GelRed and bands were visualized and quantified using an Amersham Imager 600 (GE Healthcare).

#### **DATA AND SOFTWARE AVAILABILITY**

The MNase sequencing data generated in this study has been deposited with the Gene Expression Omnibus <https://www.ncbi.nlm.nih.gov/geo/> with the accession number GSE117881. Unprocessed gel images presented in this manuscript can be found at <https://doi.org/10.17632/34fry4t69p.1>

**Molecular Cell, Volume 74**

**Supplemental Information**

**A Role for Chromatin Remodeling  
in Cohesin Loading onto Chromosomes**

**Sofía Muñoz, Masashi Minamino, Corella S. Casas-Delucchi, Harshil Patel, and Frank Uhlmann**

Figure S1

**A**

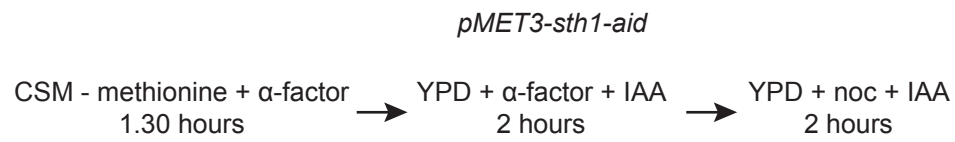

**B**

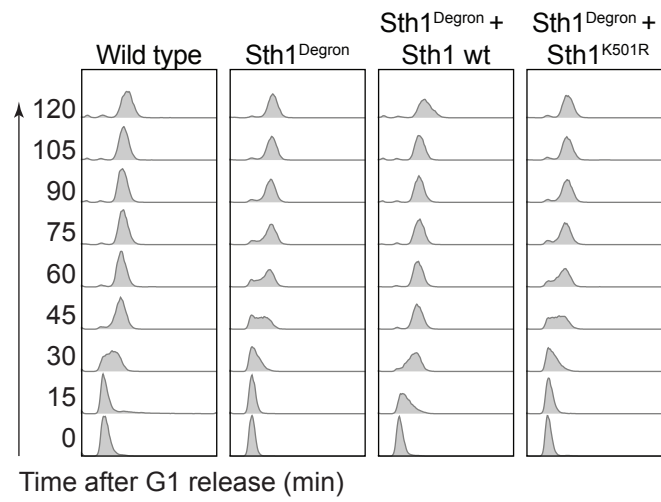

**C**

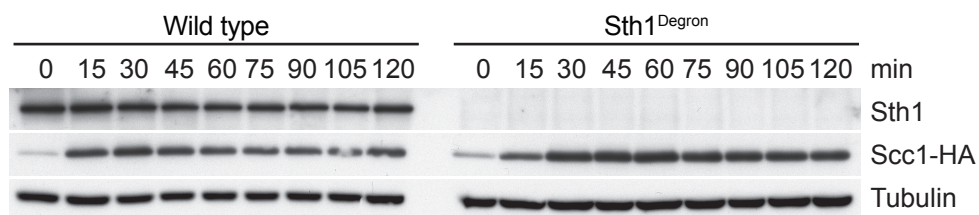

**Figure S1. Cell Synchronization Protocol Used in This Study, Related to Figure 1**

(A) Schematic of the experimental procedure followed in the *in vivo* experiments contained in this study to deplete either endogenous Sth1 or Scc2.

(B) FACS analysis of DNA content during the experiment shown in Figure 1B. A wild type control is included as well as the Sth1<sup>Degron</sup> strain in which Sth1 was depleted, next to Sth1<sup>Degron</sup> strains expressing either wild type Sth1 or Sth1<sup>K501R</sup> from an ectopic locus.

(C) Time course analysis Scc1 levels in strains expressing or depleted of Sth1. Samples for immunoblotting were taken at 15 minute intervals following release from G1 arrest into nocodazole-containing medium.



Figure S2

**A**

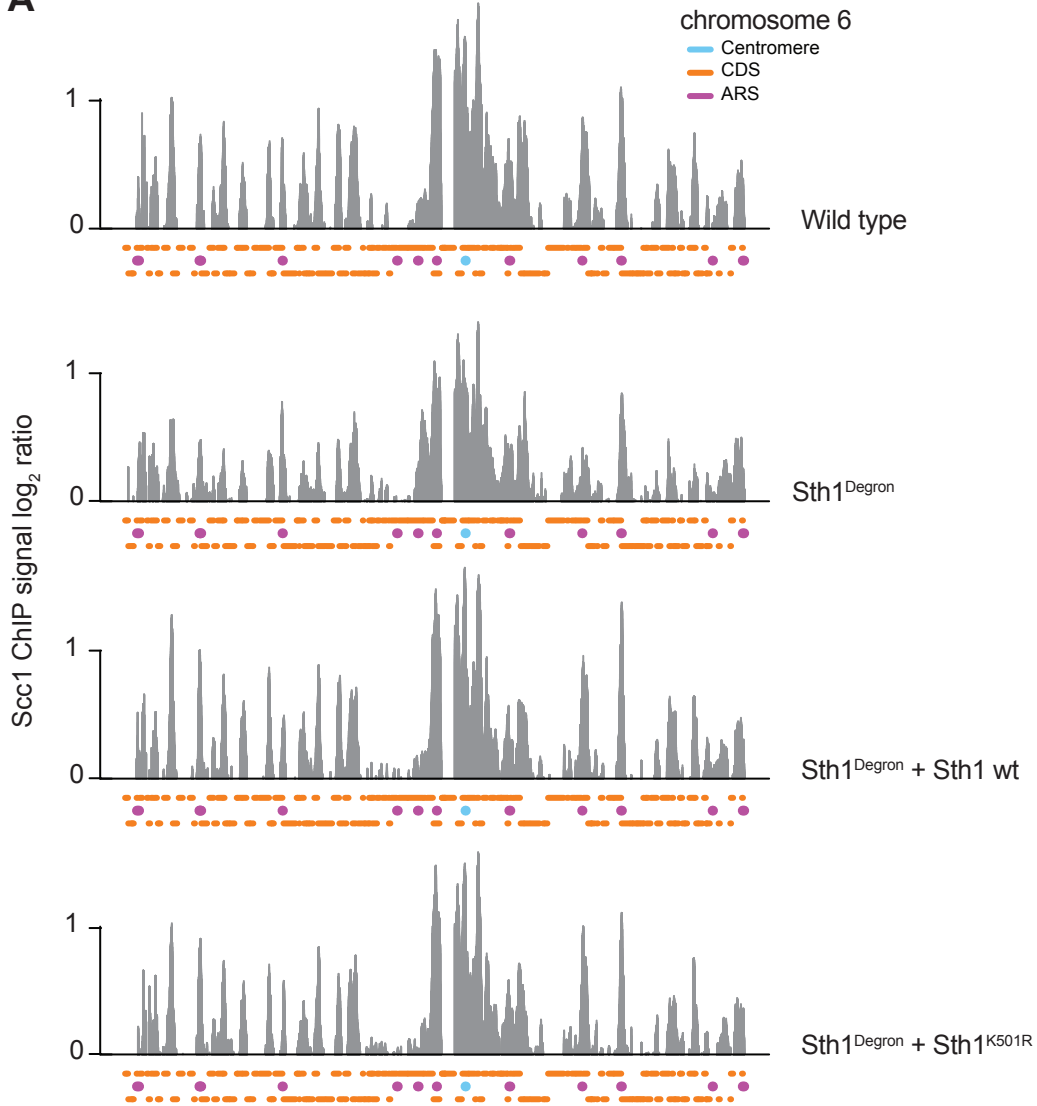

**B**

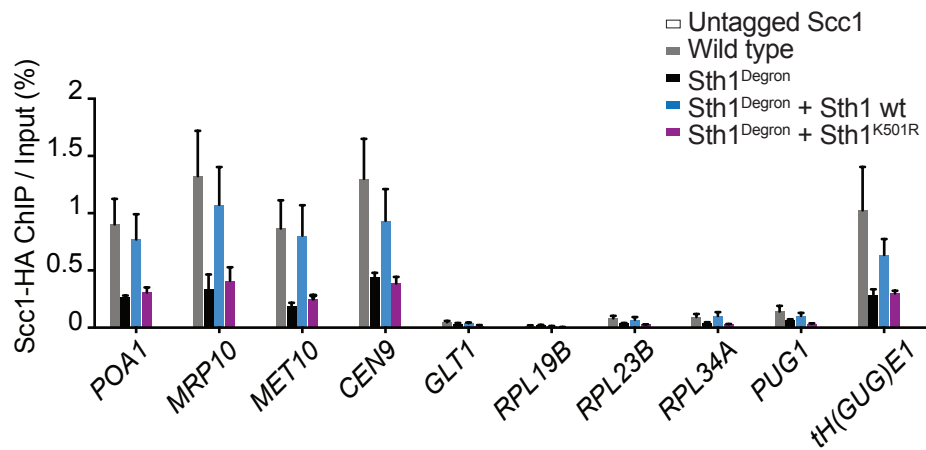

**Figure S2. Cohesin Distribution along Chromosomes following Sth1 Depletion, Related to Figure 1**

(A) Cells of the indicated genotypes were synchronized in G1, endogenous Sth1 was depleted, and released into a nocodazole-imposed mitotic arrest. ChIP analysis against HA epitope-tagged Scc1 was performed and chromatin immunoprecipitates were PCR amplified and hybridized to Affymetrix GeneChip *S. cerevisiae* tiling 1.0 R arrays. Signal intensities, relative to a whole-genome DNA sample, are shown along chromosome 6. Centromeres, replication origins and coding regions are indicated. Note that due to the PCR amplification step, the cohesin pattern does not contain quantitative information about the amount of chromosomal cohesin.

(B) as in (A) but Scc1-HA levels at three chromosome arm cohesin binding sites (*POA1*, *MRP10* and *MET10*), one centromere (*CEN9*), a negative control site (*GLT1*) and five cohesin loading sites (*RPL19B*, *RPL23B*, *RPL34A*, *PUG1*, *tH(GUG)E1*) were assessed by ChIP followed by quantitative real-time PCR. Means and SEM of three independent experiments are shown to allow a quantitative comparison of chromosomal cohesin levels. DNA recovered by ChIP from an untagged strain was also quantified but remained below the visualization limit of this graph.

Figure S3

**A**

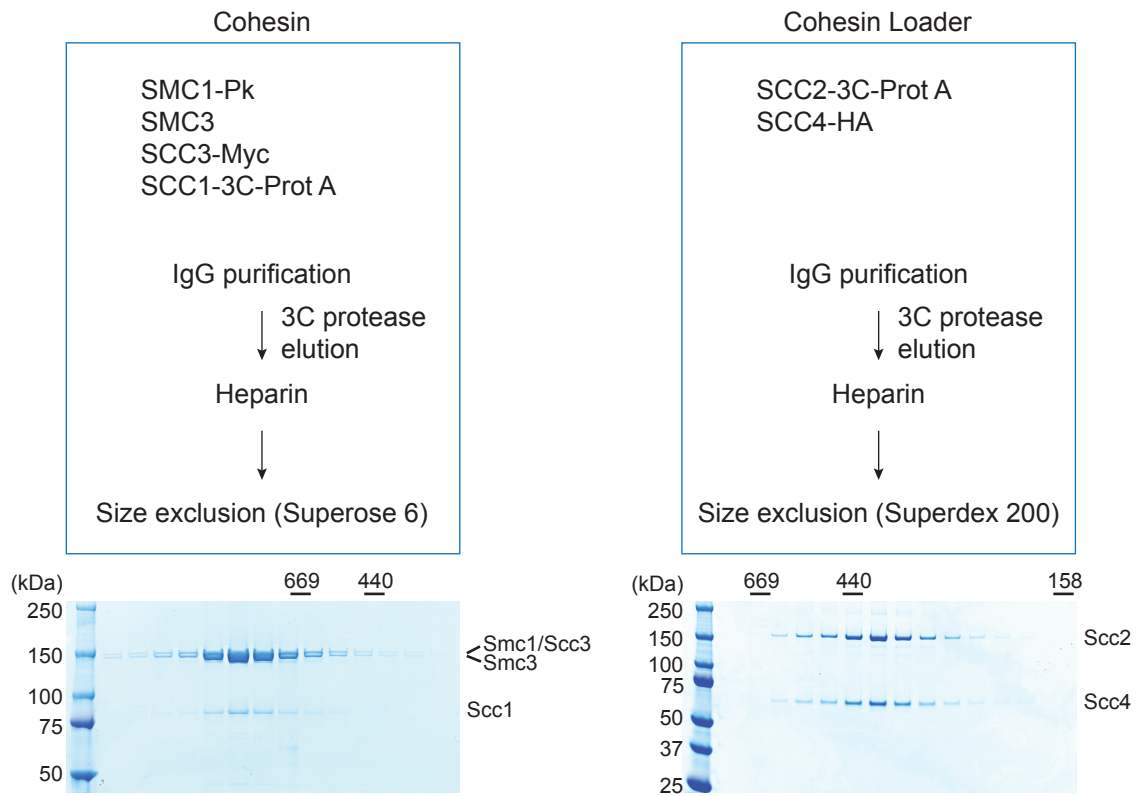

**B**

**Cohesin loading reaction**  
(Circular DNA + Cohesin + Loader + ATP)  
1h, 29 °C

↓  
**Cohesin IP (Cohesin DNA Complex on beads)**

↓  
**PstI digestion**

↓  
**Supernatant**

↓  
**Beads**

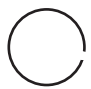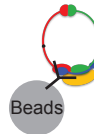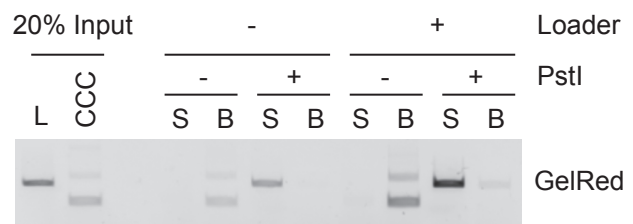

**C**

**MNase Control**

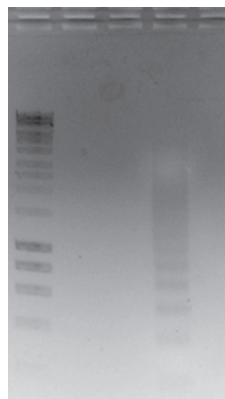

⋮  
trinucleosome  
dinucleosome  
mononucleosome

**Figure S3. Biochemical Reconstitution of Topological DNA Binding by the Budding Yeast Cohesin Ring, Related to Figure 3**

(A) Schematic of the cohesin and cohesin loader complex purification procedures. The peak fractions from the final gel filtration steps were analyzed by SDS-PAGE followed by Coomassie Blue staining.

(B) Schematic and gel image of a cohesin loading experiment, followed by DNA release by DNA linearization using the PstI restriction endonuclease to confirm the topological nature of DNA binding. The input is shown in its covalently closed circular (CCC) form, as well as following linearization (L). Supernatant (S) and beads (B) fractions of the cohesin pulldown are shown from reactions in the presence or absence of the cohesin loader, with or without PstI digestion.

(C) Micrococcal nuclease digestion of the chromatinized plasmid used as a template in the cohesin loading reaction shown in Figure 3B, confirming efficient and even nucleosome assembly.

Figure S4

**A**

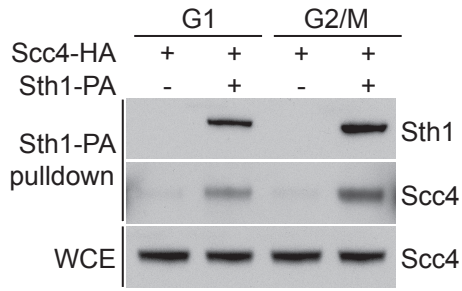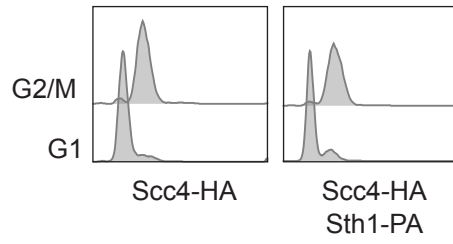

**B**

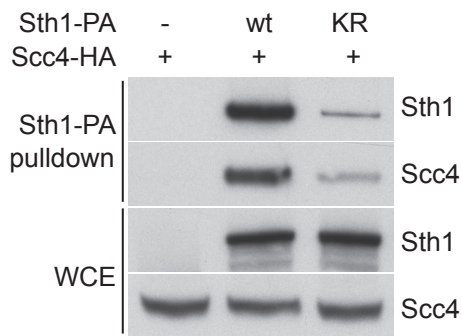

**C**

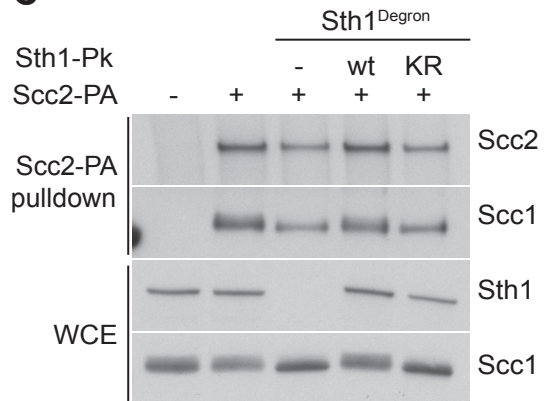



**Figure S4. Additional Interaction Analyses between RSC, Cohesin Loader and Cohesin, Related to Figure 4**

(A) RSC interaction with the cohesin loader in G1 and mitosis. As in Figure 4A, but cell extracts were prepared from aliquots of a culture arrested in G1, or following release into nocodazole-imposed mitotic arrest. FACS analysis of DNA content is shown to confirm cell cycle synchrony.

(B) Sth1<sup>K501R</sup> interacts with the cohesin loader. Cell extracts were prepared, following depletion of endogenous Sth1, from Sth1<sup>Degron</sup> strains that expressed protein A-tagged wild type Sth1 or Sth1<sup>K501R</sup>. Sth1 was adsorbed to IgG beads and coprecipitation of Scc4 was analyzed by immunoblotting. Despite similar expression levels, protein A pulldown of Sth1<sup>K501R</sup> was reproducibly less efficient compared to wild type Sth1. We do not know the reason for this difference. Based on the respective levels of Sth1 or Sth1<sup>K501R</sup> pulldown, coprecipitation of Scc4 appeared equally efficient.

(C) RSC-independent interaction between cohesin and the cohesin loader. Cell extracts were prepared from the indicated strains following Sth1 depletion, or from the indicated control strains. Protein A-tagged Scc2 was precipitated and coprecipitation of Scc1 was analyzed by immunoblotting.

Figure S5

**A**

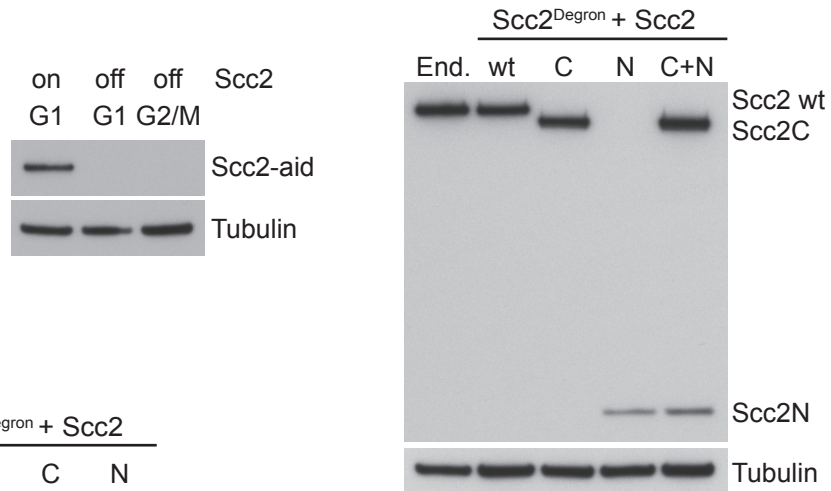

**B**

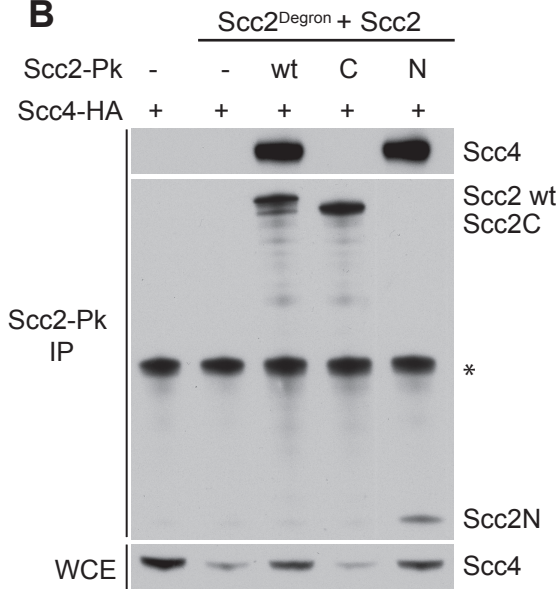

**C**

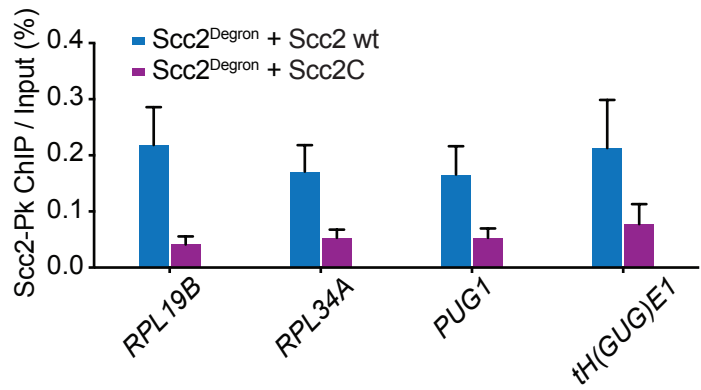

**D**

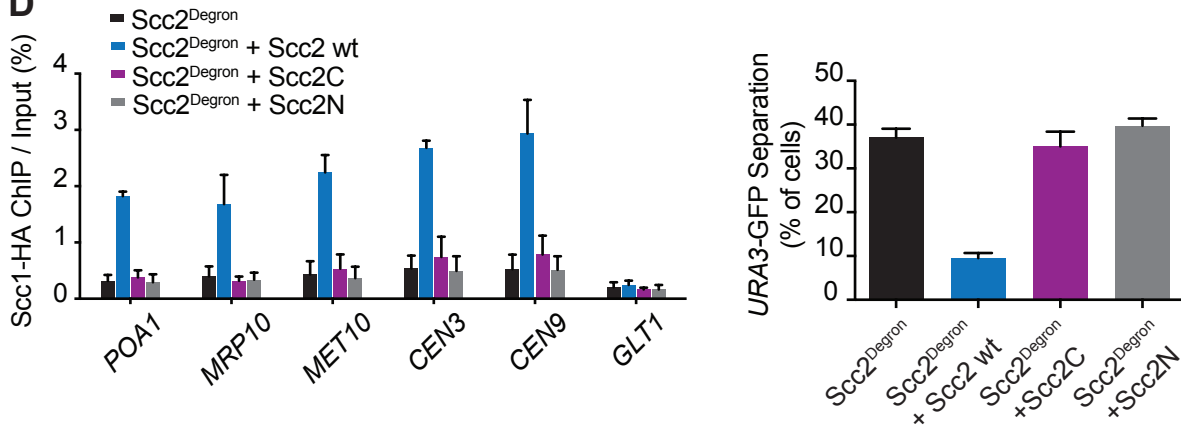

**E**

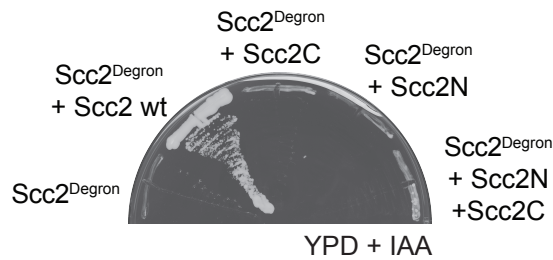

## Figure S5. Additional Characterization of the Cohesin Loader Modules, Related to Figure 5

(A) Endogenous Scc2 levels before and after depletion during G1 arrest and release into nocodazole-imposed G2/M arrest were monitored by immunoblotting with an anti-aid tag antibody (left). Immunoblot analysis of the various Scc2 fragments, fused to a Pk epitope tag, expressed under control of the Scc2 promoter at its endogenous or from an ectopic locus (right).

(B) Scc2N, but not Scc2C, interacts with and stabilizes Scc4. Cell extracts of the indicated strains were prepared after G1 arrest, endogenous Scc2 depletion and release into nocodazole-imposed mitotic arrest. The different Pk epitope-tagged Scc2 fragments were precipitated and copurification of Scc4 was analyzed by immunoblotting.

(C) Scc2C is undetectable at cohesin loading sites. Wild type Scc2 and Scc2C levels, following endogenous Scc2 depletion as in (A), were compared at four cohesin loading sites by ChIP followed by quantitative real-time PCR. Means and SEM of five independent experiments are shown.  $Scc2^{Degron} + Scc2C$   $p < 0.01$ ; two-way ANOVA test compared to  $Scc2^{Degron} + Scc2$  wt.

(D) Neither Scc2C nor Scc4-Scc2N suffices for cohesin loading. Endogenous Scc2 was depleted in G1 before cells expressing the indicated Scc2 variants were released into nocodazole-imposed mitotic arrest. Cohesin levels at five cohesin binding sites and a negative control site were analyzed by ChIP followed by quantitative real-time PCR. Means and SEM of three independent experiments are shown.  $Scc2^{Degron} + Scc2$  wt  $p < 0.01$ ;  $Scc2^{Degron} + Scc2C$  and  $Scc2^{Degron} + Scc2N$   $p$  not significant; two-way ANOVA test compared to  $Scc2^{Degron}$ . Sister chromatid cohesion at the GFP-marked *URA3* locus was scored in a similar experiment. The means and SEM of three independent experiments are shown.  $Scc2^{Degron} + Scc2$  wt  $p < 0.01$ ;  $Scc2^{Degron} + Scc2C$  and  $Scc2^{Degron} + Scc2N$   $p$  not significant; Student's *t*-test compared to  $Scc2^{Degron}$ .

(E) Scc4-Scc2N and Scc2C must be linked to support cell growth. The ability of the respective Scc2 variants to restore viability following  $Scc2^{Degron}$  depletion was tested by streaking the indicated strains on rich YPD medium containing methionine, supplemented with indole-3-acetic acid (IAA).

Figure S6

**A**

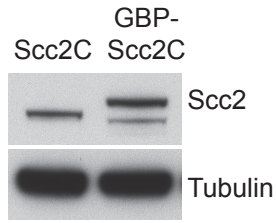

**B**

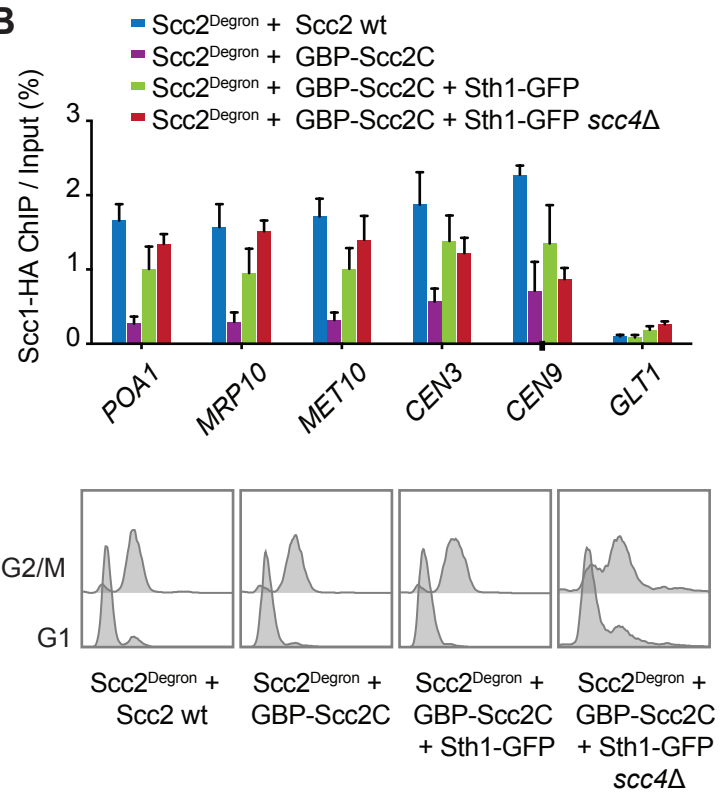

**C**

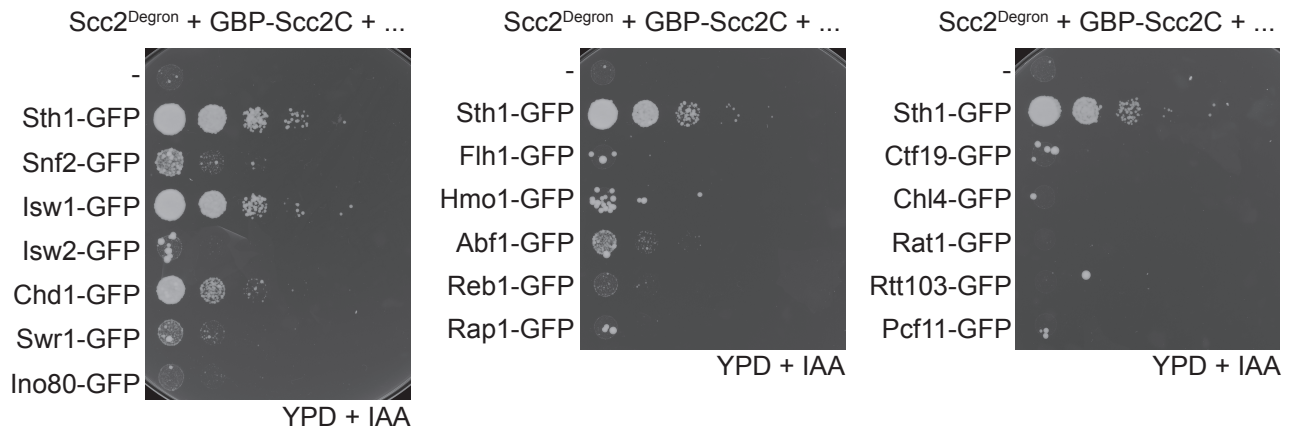

**Figure S6. Additional Data to Characterize Engineered Cohesin Loading by GBP-Sc2C, Related to Figure 6**

(A) Expression of GBP-Sc2C, next to Sc2C, was analyzed by immunoblotting against the C-terminal Pk epitope tags contained on both proteins. The faster migrating GBP-Sc2C band is likely the product of proteolytic cleavage at a flexible linker sequence between the GBP tag and Sc2C, that might be sensitive to proteases.

(B) Sc4 is dispensable for cohesin loading by GBP-Sc2C in conjunction with Sth1-GFP. Cohesin loading onto chromosomes was assessed as in Figure 6C, but including a strain lacking Sc4. Means and SEM of three independent experiments are shown. Sc2<sup>Degron</sup> + Sc2 wt, Sc2<sup>Degron</sup> + GBP-Sc2C + Sth1-GFP and Sc2<sup>Degron</sup> + GBP-Sc2C + Sth1-GFP *scc4*Δ  $p < 0.01$ ; two-way ANOVA test compared to the Sc2<sup>Degron</sup> + GBP-Sc2C strain. FACS analysis of DNA content confirmed the cell cycle stage at the time of endogenous Sc2 depletion and the mitotic arrest when the ChIP samples were taken. Note the reduced synchrony of cells lacking Sc4, suggesting that the chronic absence of Sc4 compromises cell proliferation.

(C) Cell growth as supported by GBP-Sc2C in conjunction with various putative chromatin receptor-GFP fusions. 10-fold serial dilutions of the indicated strains were spotted on YPD + IAA medium to deplete endogenous Sc2.

Table S2. **qPCR primers used in this study**

| Name        | Sequence (5' -3')         |
|-------------|---------------------------|
| POA1-F      | AAACGGCCACATCAAATACC      |
| POA1-R      | TCCAAGGGACTCCGAATATG      |
| MRP10-F     | ACCCCCTCTTCCCAGACTAA      |
| MRP10-R     | CCAGCACATTTAGGGCTCAT      |
| MET10-F     | ACTTGTGTGGCCCTACTTGG      |
| MET10-R     | CGACTTTGATGCCTCTTTCC      |
| CEN3-F      | CGCCACTTTAACAATGTGC       |
| CEN3-R      | GCAGAACCACCGTAGCAGTT      |
| CEN9-F      | TGTCACCTGGCTGTTTTGAG      |
| CEN9-R      | TGGTAATGTCAGCTGTGGA       |
| GLT1-F      | TTTGACCCCAGCACATGTTA      |
| GLT1-F      | GGGTGTGGAGTTTGTGGTCT      |
| RPL23B-F    | CCGTCAAGCTAAGTCTTGGAGAAG  |
| RPL23B-R    | CCTTAGGATTAGCGATGACACCAG  |
| RPL34A-F    | GTCTTGTGGGTCTTGGAAACAG    |
| RPL34A-R    | CAAAGTGTGGTACTGTGGTAG     |
| PUG1-F      | GCGGCAAGCTCATCCTAAAT      |
| PUG1-R      | CCCACAATTGATTCGGTAGG      |
| tH(GUG)E1-F | GAAACCCTGGTTTCGATTCTAGGAG |
| tH(GUG)E1-R | GCTCTCATGATCACCACATCTGAC  |
| CIN8-F      | AGGGCACAACACTAGATAAACAGCA |
| CIN8-R      | GGGCCATTTGCATTACCTCAGTCA  |



Table S3. **Plasmids used in this study**

| Name   | Description                                      | Purpose                                                                              | Source                     |
|--------|--------------------------------------------------|--------------------------------------------------------------------------------------|----------------------------|
| pSM15  | YIplac204-Sth1-PK <sub>3</sub>                   | Integration of wild type Sth1-PK <sub>3</sub> at <i>TRP1</i> locus                   | This study                 |
| pSM16  | YIplac204-Sth1K <sup>501R</sup> -PK <sub>3</sub> | Integration of wild type Sth1 <sup>K501R</sup> -PK <sub>3</sub> at <i>TRP1</i> locus | This study                 |
| pSM32  | YIplac204-Sth1-HA <sub>6</sub>                   | Integration of wild type Sth1-HA <sub>6</sub> at <i>TRP1</i> locus                   | This study                 |
| pSM33  | YIplac204-Sth1K <sup>501R</sup> -HA <sub>6</sub> | Integration of wild type Sth1 <sup>K501R</sup> -HA <sub>6</sub> at <i>TRP1</i> locus | This study                 |
| pSM51  | YIplac204-Sth1-PA <sub>2</sub>                   | Integration of wild type Sth1-PA <sub>2</sub> at <i>TRP1</i> locus                   | This study                 |
| pSM52  | YIplac204-Sth1K <sup>501R</sup> -PA <sub>2</sub> | Integration of wild type Sth1 <sup>K501R</sup> -PA <sub>2</sub> at <i>TRP1</i> locus | This study                 |
| pCCD51 | pBS-KSII-cut2-ARS1                               | Substrate for the cohesin loading assay                                              | This study                 |
|        | pCDFduet.H2A-H2B                                 | Histone purification                                                                 | Kurat <i>et al.</i> , 2017 |
|        | pETduet.H3-H4                                    | Histone purification                                                                 | Kurat <i>et al.</i> , 2017 |
| pCFK1  | pGEX-Nap1                                        | Nap1 purification                                                                    | Kurat <i>et al.</i> , 2017 |
| pSM2   | pRS303-Scc2-PK <sub>3</sub>                      | Integration of wild type Scc2-PK <sub>3</sub> at <i>HIS3</i> locus                   | This study                 |
| pSM4   | pRS303-Scc2-C-PK <sub>3</sub>                    | Integration of Scc2-C-PK <sub>3</sub> at <i>HIS3</i> locus                           | This study                 |
| pSM8   | pRS303-Scc2-N-PK <sub>3</sub>                    | Integration of Scc2-N-PK <sub>3</sub> at <i>HIS3</i> locus                           | This study                 |
| pSM11  | pRS304-Scc2-N-PK <sub>3</sub>                    | Integration of Scc2-N-PK <sub>3</sub> at <i>TRP1</i> locus                           | This study                 |
| pSM30  | pRS303-Scc2-HA <sub>6</sub>                      | Integration of wild type Scc2-HA <sub>6</sub> at <i>HIS3</i> locus                   | This study                 |
| pSM31  | pRS303-Scc2-C-HA <sub>6</sub>                    | Integration of Scc2-C-HA <sub>6</sub> at <i>HIS3</i> locus                           | This study                 |
| pSM34  | pRS303-Scc2-N-HA <sub>6</sub>                    | Integration of Scc2-N-HA <sub>6</sub> at <i>HIS3</i> locus                           | This study                 |
| pSM50  | pRS303-GBP-Scc2-C-PK <sub>3</sub>                | Integration of Scc2-GBP-C-PK <sub>3</sub> at <i>HIS3</i> locus                       | This study                 |
